# Supplementary material for: NK cell exhaustion in Wilson’s disease revealed by single-cell RNA sequencing predicts the prognosis of cholecystitis
Source: eLife journal article supplement (doi:10.7554/elife.98867), 2024-07-10
Supplement: supp1 [file elife-98867-supp1-v1.pdf]

|        |                 |       |        |       |       |        |        |        |        |
|--------|-----------------|-------|--------|-------|-------|--------|--------|--------|--------|
| TandNK | NK_FCGR3A       | 7.901 | 4.678  | 5.126 | 5.902 | 3.639  | 11.831 | 4.586  | 6.685  |
|        | CD4NaiveT_CCR7  | 3.284 | 3.905  | 2.429 | 3.206 | 3.791  | 5.313  | 1.706  | 3.604  |
|        | CD4Tmem_CD40LG  | 3.351 | 2.135  | 3.633 | 3.040 | 6.207  | 2.268  | 2.120  | 3.532  |
|        | CD4Treg_CTLA4   | 0.750 | 0.264  | 1.738 | 0.918 | 0.382  | 0.306  | 0.253  | 0.314  |
|        | CD8MAIT_KLRB1   | 4.384 | 5.552  | 3.766 | 4.568 | 5.443  | 8.786  | 15.985 | 10.071 |
|        | CD8MAIT_SLC4A10 | 4.234 | 3.559  | 1.783 | 3.192 | 4.953  | 9.256  | 22.010 | 12.073 |
|        | CD8Teff_GZMH    | 6.801 | 12.691 | 8.491 | 9.328 | 12.766 | 6.007  | 7.386  | 8.720  |
|        | CD8Teff_GZMK    | 3.684 | 4.068  | 5.505 | 4.419 | 10.228 | 7.295  | 8.785  | 8.769  |
|        | CD8Teff_ISG15   | 0.100 | 0.000  | 0.022 | 0.041 | 0.015  | 0.041  | 0.013  | 0.023  |
|        | CD8Teff_MT1X    | 1.234 | 1.607  | 0.646 | 1.162 | 0.810  | 0.143  | 0.160  | 0.371  |

## Supplementary File 1b

| gene_id         | Cluster | gene_id        | Cluster | gene_id         | Cluster |
|-----------------|---------|----------------|---------|-----------------|---------|
| 1 ACTB          | 1       | 757 ARMC6      | 1       | 1517 EGR2       | 2       |
| 2 RPS26         | 1       | 758 DHPS       | 1       | 1518 BTG3       | 2       |
| 3 GIMAP7        | 1       | 759 ELP3       | 1       | 1519 HIC1       | 2       |
| 4 IGKC          | 1       | 760 MR11       | 1       | 1520 GZF1       | 2       |
| 5 FCER1G        | 1       | 761 CD38       | 1       | 1521 PTGES3     | 2       |
| 6 GSTP1         | 1       | 762 AC022021.1 | 1       | 1522 HMGCS1     | 2       |
| 7 ACTG1         | 1       | 763 PNKD       | 1       | 1523 ARG2       | 2       |
| 8 CCL5          | 1       | 764 C12orf10   | 1       | 1524 SLC25A33   | 2       |
| 9 AC007952.4    | 1       | 765 FBXL6      | 1       | 1525 CNOT2      | 2       |
| 10 KLRD1        | 1       | 766 CLUAP1     | 1       | 1526 UBE2B      | 2       |
| 11 CLIC3        | 1       | 767 OFD1       | 1       | 1527 AHSA1      | 2       |
| 12 CD7          | 1       | 768 COX5A      | 1       | 1528 OAZ1       | 2       |
| 13 TMSB4X       | 1       | 769 ANKRD10    | 1       | 1529 HNRNPC     | 2       |
| 14 GZMA         | 1       | 770 ATP5S      | 1       | 1530 AMD1       | 2       |
| 15 RSRP1        | 1       | 771 TBC1D10A   | 1       | 1531 CHD4       | 2       |
| 16 GAPDH        | 1       | 772 METTL26    | 1       | 1532 MIDN       | 2       |
| 17 MYL12A       | 1       | 773 TARSL2     | 1       | 1533 SERP1      | 2       |
| 18 <b>KLRC1</b> | 1       | 774 TAF9       | 1       | 1534 NAA50      | 2       |
| 19 CD247        | 1       | 775 ADD1       | 1       | 1535 MOB3A      | 2       |
| 20 ID2          | 1       | 776 DEXI       | 1       | 1536 KBTBD2     | 2       |
| 21 XIST         | 1       | 777 SYNJ2BP    | 1       | 1537 YME1L1     | 2       |
| 22 PFN1         | 1       | 778 TMEM106C   | 1       | 1538 SLC2A3     | 2       |
| 23 CLIC1        | 1       | 779 TMOD3      | 1       | 1539 MAT2A      | 2       |
| 24 SOCS1        | 1       | 780 CLNS1A     | 1       | 1540 AC103591.3 | 2       |
| 25 GZMK         | 1       | 781 STUB1      | 1       | 1541 BIRC2      | 2       |
| 26 CORO1A       | 1       | 782 DPM3       | 1       | 1542 TNFSF14    | 2       |
| 27 HCST         | 1       | 783 ATP6V1F    | 1       | 1543 POLR2K     | 2       |
| 28 HLA-B        | 1       | 784 ZNF567     | 1       | 1544 EHD1       | 2       |
| 29 TXK          | 1       | 785 ECHS1      | 1       | 1545 CLK1       | 2       |
| 30 CITED2       | 1       | 786 NAGLU      | 1       | 1546 KPNA2      | 2       |
| 31 ATP5F1E      | 1       | 787 MAF1       | 1       | 1547 PABPC4     | 2       |
| 32 TYROBP       | 1       | 788 ATP5F1C    | 1       | 1548 SUB1       | 2       |
| 33 IFITM2       | 1       | 789 LBR        | 1       | 1549 CCT4       | 2       |
| 34 LY6E         | 1       | 790 TEFM       | 1       | 1550 TSC22D2    | 2       |
| 35 SESN1        | 1       | 791 APH1A      | 1       | 1551 RPLP1      | 2       |
| 36 LSP1         | 1       | 792 POLR2I     | 1       | 1552 MIR222HG   | 2       |
| 37 CD63         | 1       | 793 CAMK1      | 1       | 1553 SFPQ       | 2       |
| 38 CTSD         | 1       | 794 RTRAF      | 1       | 1554 RPL35      | 2       |
| 39 EVL          | 1       | 795 BTF3L4     | 1       | 1555 TIFA       | 2       |
| 40 PSME1        | 1       | 796 ZFP14      | 1       | 1556 SKP1       | 2       |
| 41 FKBP5        | 1       | 797 METTL23    | 1       | 1557 TMEM263    | 2       |
| 42 CFL1         | 1       | 798 FAM50B     | 1       | 1558 NBEAL1     | 2       |
| 43 TMIGD2       | 1       | 799 COMMD9     | 1       | 1559 UBE2A      | 2       |
| 44 GADD45G      | 1       | 800 CSK        | 1       | 1560 ZBTB21     | 2       |
| 45 GABPB1-A     | 1       | 801 SDAD1      | 1       | 1561 LEPROTL1   | 2       |
| 46 RAC2         | 1       | 802 TNF2       | 1       | 1562 ZBTB10     | 2       |
| 47 ARPC3        | 1       | 803 IMP3       | 1       | 1563 FAM107B    | 2       |
| 48 GADD45B      | 1       | 804 SF3B5      | 1       | 1564 TAF13      | 2       |
| 49 ARRDC3       | 1       | 805 APEX1      | 1       | 1565 GOLGB1     | 2       |
| 50 CD160        | 1       | 806 ZNF428     | 1       | 1566 SERTAD3    | 2       |
| 51 ETS1         | 1       | 807 METTL3     | 1       | 1567 SLC1A5     | 2       |
| 52 MYL12B       | 1       | 808 CFAP97     | 1       | 1568 RFX1       | 2       |
| 53 PTGDR        | 1       | 809 TERF2IP    | 1       | 1569 AZIN1      | 2       |
| 54 AC104506.1   | 1       | 810 STX10      | 1       | 1570 ZDBF2      | 2       |
| 55 ZBTB16       | 1       | 811 RALY       | 1       | 1571 NSMCE3     | 2       |
| 56 MAPK1        | 1       | 812 TRAPPC2L   | 1       | 1572 MKNK2      | 2       |
| 57 IGHA1        | 1       | 813 CENPT      | 1       | 1573 BCL2L11    | 2       |
| 58 RARRES3      | 1       | 814 SLC7A6OS   | 1       | 1574 NFKB2      | 2       |
| 59 INTS6        | 1       | 815 C11orf58   | 1       | 1575 H2AFJ      | 2       |
| 60 FUS          | 1       | 816 ZNF75A     | 1       | 1576 NFKBIE     | 2       |
| 61 ILF3-DT      | 1       | 817 TUBB       | 1       | 1577 UBE2D3     | 2       |
| 62 TRAPPC1      | 1       | 818 VPS26A     | 1       | 1578 RHOH       | 2       |
| 63 GZMM         | 1       | 819 BCL2       | 1       | 1579 THUMPD3-   | 2       |
| 64 RASA2        | 1       | 820 PDCD6      | 1       | 1580 IFITM1     | 2       |
| 65 EIF3G        | 1       | 821 SP110      | 1       | 1581 TOB2       | 2       |
| 66 AL355075.4   | 1       | 822 ITGA4      | 1       | 1582 EGR3       | 2       |

|     |            |   |     |            |   |      |            |   |
|-----|------------|---|-----|------------|---|------|------------|---|
| 67  | SERF2      | 1 | 823 | MLEC       | 1 | 1583 | NASP       | 2 |
| 68  | GIMAP4     | 1 | 824 | ASAH1      | 1 | 1584 | SIRT1      | 2 |
| 69  | ITM2C      | 1 | 825 | TMEM203    | 1 | 1585 | NAMPT      | 2 |
| 70  | TMA7       | 1 | 826 | C8orf59    | 1 | 1586 | RIPK2      | 2 |
| 71  | TRDC       | 1 | 827 | DDIT4      | 1 | 1587 | ICAM4      | 2 |
| 72  | C4orf3     | 1 | 828 | TMEM42     | 1 | 1588 | ALG13      | 2 |
| 73  | CXCR6      | 1 | 829 | CLNK       | 1 | 1589 | THAP2      | 2 |
| 74  | NDUFA4     | 1 | 830 | PGBD4      | 1 | 1590 | GCH1       | 2 |
| 75  | TLN1       | 1 | 831 | SPCS1      | 1 | 1591 | IFNGR1     | 2 |
| 76  | GIMAP1     | 1 | 832 | CDC16      | 1 | 1592 | HIST2H2AC  | 2 |
| 77  | PSME2      | 1 | 833 | TSPAN5     | 1 | 1593 | PDE7A      | 2 |
| 78  | UQCR11     | 1 | 834 | TRMT10B    | 1 | 1594 | SRSF7      | 2 |
| 79  | PIIB       | 1 | 835 | AUTS2      | 1 | 1595 | PNPLA8     | 2 |
| 80  | ELOB       | 1 | 836 | TBRG4      | 1 | 1596 | MMP9       | 2 |
| 81  | GGNBP2     | 1 | 837 | PLP2       | 1 | 1597 | RBM38      | 2 |
| 82  | SPCS2      | 1 | 838 | XRCC5      | 1 | 1598 | ATG101     | 2 |
| 83  | CHST12     | 1 | 839 | AC243829.1 | 1 | 1599 | NLRP3      | 2 |
| 84  | RHOC       | 1 | 840 | NIFK       | 1 | 1600 | CASP3      | 2 |
| 85  | PRELID1    | 1 | 841 | ZNF302     | 1 | 1601 | JPT1       | 2 |
| 86  | ARHGDIB    | 1 | 842 | ARSK       | 1 | 1602 | TANK       | 2 |
| 87  | AP001160.1 | 1 | 843 | SNAPC5     | 1 | 1603 | ISG20L2    | 2 |
| 88  | AL627171.1 | 1 | 844 | GHITM      | 1 | 1604 | CNOT6L     | 2 |
| 89  | RHOA       | 1 | 845 | COMMD2     | 1 | 1605 | SIK1B      | 2 |
| 90  | ENO1       | 1 | 846 | COMTD1     | 1 | 1606 | RHEB       | 2 |
| 91  | IKZF1      | 1 | 847 | WDR1       | 1 | 1607 | LIF        | 2 |
| 92  | AC108134.2 | 1 | 848 | DNMT3A     | 1 | 1608 | SC5D       | 2 |
| 93  | PPPICA     | 1 | 849 | SYK        | 1 | 1609 | MAP1LC3A   | 2 |
| 94  | PPP1R14B   | 1 | 850 | TMEM126B   | 1 | 1610 | USP36      | 2 |
| 95  | ATP5MC2    | 1 | 851 | U2AF1L5    | 1 | 1611 | RAB21      | 2 |
| 96  | IGHM       | 1 | 852 | TMCO1      | 1 | 1612 | RYBP       | 2 |
| 97  | CDC42      | 1 | 853 | MPC1       | 1 | 1613 | TFRC       | 2 |
| 98  | ACAP1      | 1 | 854 | CIR1       | 1 | 1614 | DDX21      | 2 |
| 99  | IFI16      | 1 | 855 | RBL2       | 1 | 1615 | ELOVL5     | 2 |
| 100 | OST4       | 1 | 856 | CCDC124    | 1 | 1616 | DBF4       | 2 |
| 101 | PNISR      | 1 | 857 | SFXN1      | 1 | 1617 | KDM2A      | 2 |
| 102 | PLEKHF1    | 1 | 858 | TSNAX      | 1 | 1618 | RNF168     | 2 |
| 103 | DAD1       | 1 | 859 | M6PR       | 1 | 1619 | DUSP6      | 2 |
| 104 | PYHIN1     | 1 | 860 | MRPS5      | 1 | 1620 | SIK2       | 2 |
| 105 | PRDX5      | 1 | 861 | DCP2       | 1 | 1621 | DNAJB9     | 2 |
| 106 | CAP1       | 1 | 862 | CCDC85B    | 1 | 1622 | AKIRIN1    | 2 |
| 107 | ALOX5AP    | 1 | 863 | SH2D1B     | 1 | 1623 | RARA       | 2 |
| 108 | APMAP      | 1 | 864 | RCBTB2     | 1 | 1624 | LRIF1      | 2 |
| 109 | BST2       | 1 | 865 | H6PD       | 1 | 1625 | MAP2K3     | 2 |
| 110 | EOMES      | 1 | 866 | RBM43      | 1 | 1626 | EIF1AY     | 2 |
| 111 | SET        | 1 | 867 | SUMO2      | 1 | 1627 | PPP1CB     | 2 |
| 112 | LAT2       | 1 | 868 | OGT        | 1 | 1628 | CRYBG1     | 2 |
| 113 | ARGLU1     | 1 | 869 | PSMF1      | 1 | 1629 | RASL11A    | 2 |
| 114 | FASLG      | 1 | 870 | ZNF439     | 1 | 1630 | MOB4       | 2 |
| 115 | CD53       | 1 | 871 | VDAC1      | 1 | 1631 | DYNLL2     | 2 |
| 116 | TBC1D10C   | 1 | 872 | PARK7      | 1 | 1632 | CYSLTR2    | 2 |
| 117 | IFIT2      | 1 | 873 | A1BG       | 1 | 1633 | CCNT1      | 2 |
| 118 | MSN        | 1 | 874 | EMC1       | 1 | 1634 | ISCA1      | 2 |
| 119 | TMEM141    | 1 | 875 | CKLF       | 1 | 1635 | CMC1       | 2 |
| 120 | ARL6IP4    | 1 | 876 | PAK2       | 1 | 1636 | SRSF5      | 2 |
| 121 | EIF5A      | 1 | 877 | FNTA       | 1 | 1637 | SNHG8      | 2 |
| 122 | HMGB1      | 1 | 878 | UBE2D2     | 1 | 1638 | TRA2A      | 2 |
| 123 | PSMB8      | 1 | 879 | PIGBOS1    | 1 | 1639 | LUZP1      | 2 |
| 124 | PTPRC      | 1 | 880 | NDUFAB1    | 1 | 1640 | NKRF       | 2 |
| 125 | IGHG3      | 1 | 881 | CHRNB1     | 1 | 1641 | PPP2CA     | 2 |
| 126 | C19orf66   | 1 | 882 | COX14      | 1 | 1642 | PIM2       | 2 |
| 127 | PIK3IP1    | 1 | 883 | AL451085.1 | 1 | 1643 | ISG15      | 2 |
| 128 | HMG1       | 1 | 884 | CTBP1      | 1 | 1644 | EGR4       | 2 |
| 129 | ANXA6      | 1 | 885 | BUB3       | 1 | 1645 | MORF4L2    | 2 |
| 130 | ECH1       | 1 | 886 | NUTF2      | 1 | 1646 | NDUFS5     | 2 |
| 131 | HSD17B10   | 1 | 887 | HINT2      | 1 | 1647 | TOPORS     | 2 |
| 132 | CSKMT      | 1 | 888 | MRPL28     | 1 | 1648 | AL359915.2 | 2 |
| 133 | PAXX       | 1 | 889 | RTP4       | 1 | 1649 | ZNF571     | 2 |
| 134 | ATP5MD     | 1 | 890 | ENPP4      | 1 | 1650 | AURKA      | 2 |

|                |   |                |   |                 |   |
|----------------|---|----------------|---|-----------------|---|
| 135 VAMP8      | 1 | 891 FARSA      | 1 | 1651 GADD45A    | 2 |
| 136 GMFG       | 1 | 892 AC017083.1 | 1 | 1652 CCDC117    | 2 |
| 137 WDR83OS    | 1 | 893 MLH3       | 1 | 1653 TRIM39     | 2 |
| 138 GTF3A      | 1 | 894 NIFK-AS1   | 1 | 1654 TGIF2      | 2 |
| 139 MYL6       | 1 | 895 BOD1       | 1 | 1655 ATP1A1     | 2 |
| 140 ITGB2      | 1 | 896 SASH3      | 1 | 1656 IRF2BP2    | 2 |
| 141 TRAF3IP3   | 1 | 897 ZDHHC24    | 1 | 1657 TMEM217    | 2 |
| 142 PSMB3      | 1 | 898 C19orf24   | 1 | 1658 EMD        | 2 |
| 143 COX6B1     | 1 | 899 CNDP2      | 1 | 1659 ZFAS1      | 2 |
| 144 NT5C       | 1 | 900 NOL7       | 1 | 1660 SLC35A2    | 2 |
| 145 GPATCH8    | 1 | 901 CCDC28A    | 1 | 1661 CD72       | 2 |
| 146 ARPC4      | 1 | 902 ARHGDI A   | 1 | 1662 SRSF3      | 2 |
| 147 IGLC2      | 1 | 903 ARL6IP5    | 1 | 1663 BTBD7      | 2 |
| 148 CAPZB      | 1 | 904 IER3IP1    | 1 | 1664 RABGEF1    | 2 |
| 149 MDH2       | 1 | 905 IFI35      | 1 | 1665 ELMSAN1    | 2 |
| 150 COX6C      | 1 | 906 LYPLA2     | 1 | 1666 ZNF570     | 2 |
| 151 AC243965.1 | 1 | 907 POLR2L     | 1 | 1667 FOSL1      | 2 |
| 152 TCIRG1     | 1 | 908 TMEM156    | 1 | 1668 EIF4G2     | 2 |
| 153 FKBP8      | 1 | 909 EIF3K      | 1 | 1669 DCUN1D3    | 2 |
| 154 PHYKPL     | 1 | 910 HAGHL      | 1 | 1670 MEF2D      | 2 |
| 155 1-Sep      | 1 | 911 NCOR1      | 1 | 1671 RSL24D1    | 2 |
| 156 NDUFB2     | 1 | 912 BRI3       | 1 | 1672 TRAF4      | 2 |
| 157 LCP1       | 1 | 913 JMJD8      | 1 | 1673 MRPL1      | 2 |
| 158 CD81       | 1 | 914 TPR        | 1 | 1674 CBX4       | 2 |
| 159 APBB1IP    | 1 | 915 VEGFB      | 1 | 1675 FABP5      | 2 |
| 160 COTL1      | 1 | 916 OSTF1      | 1 | 1676 RPL22L1    | 2 |
| 161 AC243960.1 | 1 | 917 WDR77      | 1 | 1677 NSUN6      | 2 |
| 162 HLA-DQB1   | 1 | 918 SH3BGRL    | 1 | 1678 STIP1      | 2 |
| 163 S100A11    | 1 | 919 UTP25      | 1 | 1679 SLC35D1    | 2 |
| 164 SYNGR1     | 1 | 920 ORMDL2     | 1 | 1680 GLS        | 2 |
| 165 SSBP4      | 1 | 921 PKN1       | 1 | 1681 SNU13      | 2 |
| 166 UQCR10     | 1 | 922 PEPD       | 1 | 1682 NDEL1      | 2 |
| 167 ITM2A      | 1 | 923 BABAM1     | 1 | 1683 WDR47      | 2 |
| 168 COG2       | 1 | 924 DNAJC1     | 1 | 1684 SPATA2L    | 2 |
| 169 MRPS34     | 1 | 925 G6PD       | 1 | 1685 AC058791.1 | 2 |
| 170 MATK       | 1 | 926 SDHAF2     | 1 | 1686 TARS       | 2 |
| 171 IFITM3     | 1 | 927 NUDCD2     | 1 | 1687 NUDT4      | 2 |
| 172 PPP1R18    | 1 | 928 PARP16     | 1 | 1688 SERPINH1   | 2 |
| 173 UBE2L6     | 1 | 929 SRP72      | 1 | 1689 LMNB1      | 2 |
| 174 APRT       | 1 | 930 LZTR1      | 1 | 1690 SS18L2     | 2 |
| 175 GSTK1      | 1 | 931 TMA16      | 1 | 1691 IL23R      | 2 |
| 176 TESC       | 1 | 932 GNG5       | 1 | 1692 UBR1       | 2 |
| 177 YWHAB      | 1 | 933 NAPEPLD    | 1 | 1693 SLC25A3    | 2 |
| 178 SLFN5      | 1 | 934 C19orf53   | 1 | 1694 CD27       | 2 |
| 179 RASA1      | 1 | 935 MTERF4     | 1 | 1695 TMEM88     | 2 |
| 180 NEDD8      | 1 | 936 CUTA       | 1 | 1696 DNTTIP2    | 2 |
| 181 DYNLT1     | 1 | 937 VSTM4      | 1 | 1697 STMN1      | 2 |
| 182 AP3S1      | 1 | 938 NAXE       | 1 | 1698 LETM2      | 2 |
| 183 PARP8      | 1 | 939 AC110769.2 | 1 | 1699 MASTL      | 2 |
| 184 AC023157.3 | 1 | 940 MIF4GD     | 1 | 1700 UBE2D1     | 2 |
| 185 ATP5F1A    | 1 | 941 MZT2A      | 1 | 1701 CHIC2      | 2 |
| 186 ARPC5      | 1 | 942 PDLIM1     | 1 | 1702 AL021707.6 | 2 |
| 187 ATP5F1D    | 1 | 943 NELFB      | 1 | 1703 MAZ        | 2 |
| 188 RNF187     | 1 | 944 CUEDC2     | 1 | 1704 TOP1       | 2 |
| 189 LAMTOR4    | 1 | 945 EXOSC7     | 1 | 1705 SPRY1      | 2 |
| 190 COPE       | 1 | 946 FGD4       | 1 | 1706 VEGFA      | 2 |
| 191 PLEKHJ1    | 1 | 947 SNRPD3     | 1 | 1707 TP53INP2   | 2 |
| 192 TMED9      | 1 | 948 POLR2J     | 1 | 1708 CYLD       | 2 |
| 193 EID1       | 1 | 949 STK17A     | 1 | 1709 FAM222A    | 2 |
| 194 NDUFC2     | 1 | 950 MESD       | 1 | 1710 PDCL3      | 2 |
| 195 ANP32A     | 1 | 951 RASAL3     | 1 | 1711 INPP4B     | 2 |
| 196 PSMB1      | 1 | 952 MEA1       | 1 | 1712 TESK1      | 2 |
| 197 PSMB9      | 1 | 953 DYNC112    | 1 | 1713 ALB        | 2 |
| 198 ATP5MC3    | 1 | 954 VPS36      | 1 | 1714 STARD7     | 2 |
| 199 ATP5ME     | 1 | 955 ABHD14B    | 1 | 1715 RNF138     | 2 |
| 200 MMP25-AS   | 1 | 956 MRPL44     | 1 | 1716 PER2       | 2 |
| 201 FBXW5      | 1 | 957 RNF167     | 1 | 1717 AH11       | 2 |
| 202 IPCEF1     | 1 | 958 CCDC127    | 1 | 1718 AC009404.1 | 2 |

|     |            |   |      |            |   |      |            |   |
|-----|------------|---|------|------------|---|------|------------|---|
| 203 | TGFBR2     | 1 | 959  | PRR13      | 1 | 1719 | SNHG15     | 2 |
| 204 | PEBP1      | 1 | 960  | PSIP1      | 1 | 1720 | UBAP1      | 2 |
| 205 | PKM        | 1 | 961  | SH3GLB2    | 1 | 1721 | INTS6L     | 2 |
| 206 | TP11       | 1 | 962  | TMEM258    | 1 | 1722 | CYGB       | 2 |
| 207 | IGHG1      | 1 | 963  | MGAT4B     | 1 | 1723 | CH25H      | 2 |
| 208 | SNTB2      | 1 | 964  | SUMF2      | 1 | 1724 | B3GALNT2   | 2 |
| 209 | LAMTOR1    | 1 | 965  | SDHAF1     | 1 | 1725 | ADRA2B     | 2 |
| 210 | LINC00324  | 1 | 966  | SRSF10     | 1 | 1726 | PHLDB2     | 2 |
| 211 | MIEN1      | 1 | 967  | HEXDC      | 1 | 1727 | SEC24A     | 2 |
| 212 | LAPTM5     | 1 | 968  | TAF15      | 1 | 1728 | CDC37      | 2 |
| 213 | CALM3      | 1 | 969  | OTUD6B-A:  | 1 | 1729 | CTDP1      | 2 |
| 214 | CCT7       | 1 | 970  | VKORC1     | 1 | 1730 | CCNYL1     | 2 |
| 215 | NME1       | 1 | 971  | C14orf119  | 1 | 1731 | ATF4       | 2 |
| 216 | RFLNB      | 1 | 972  | FO393401.1 | 1 | 1732 | ARL4D      | 2 |
| 217 | COX8A      | 1 | 973  | LINC02084  | 1 | 1733 | DUSP10     | 2 |
| 218 | C19orf70   | 1 | 974  | TMEM134    | 1 | 1734 | KCNQ10T1   | 2 |
| 219 | RSBN1L     | 1 | 975  | TBCE       | 1 | 1735 | KLF16      | 2 |
| 220 | DERL1      | 1 | 976  | DCTPP1     | 1 | 1736 | ARHGEF39   | 2 |
| 221 | POLR2G     | 1 | 977  | TFB1M      | 1 | 1737 | SPAG4      | 2 |
| 222 | ATP5MPL    | 1 | 978  | EPS8L2     | 1 | 1738 | EZH2       | 2 |
| 223 | BCAP31     | 1 | 979  | EMC6       | 1 | 1739 | STAG2      | 2 |
| 224 | TGOLN2     | 1 | 980  | AC026471.1 | 1 | 1740 | F12        | 2 |
| 225 | UBL5       | 1 | 981  | PPIE       | 1 | 1741 | MED13      | 2 |
| 226 | HBB        | 1 | 982  | CRAMP1     | 1 | 1742 | RAB11FIP1  | 2 |
| 227 | ATP5MF     | 1 | 983  | THUMPD3    | 1 | 1743 | EML4       | 2 |
| 228 | RNF213     | 1 | 984  | AKT1       | 1 | 1744 | RNMT       | 2 |
| 229 | CEBPD      | 1 | 985  | MIGA1      | 1 | 1745 | IRGQ       | 2 |
| 230 | HMOX2      | 1 | 986  | SEC22B     | 1 | 1746 | GEM        | 2 |
| 231 | LINC01970  | 1 | 987  | DENND6A-   | 1 | 1747 | TENT4B     | 2 |
| 232 | CHMP2A     | 1 | 988  | ADGRG3     | 1 | 1748 | WDR26      | 2 |
| 233 | COPS9      | 1 | 989  | LPIN2      | 1 | 1749 | TGIF1      | 2 |
| 234 | NUCKS1     | 1 | 990  | NAP1L4     | 1 | 1750 | WDR45B     | 2 |
| 235 | ACTR2      | 1 | 991  | ZNF326     | 1 | 1751 | NFAT5      | 2 |
| 236 | FERMT3     | 1 | 992  | AL358472.4 | 1 | 1752 | IL27RA     | 2 |
| 237 | FIS1       | 1 | 993  | FANCF      | 1 | 1753 | HELB       | 2 |
| 238 | NABP1      | 1 | 994  | MAPKAPK:   | 1 | 1754 | ARID4B     | 2 |
| 239 | CSTB       | 1 | 995  | STXBP2     | 1 | 1755 | SKI        | 2 |
| 240 | TRBC2      | 1 | 996  | HIGD1A     | 1 | 1756 | CGAS       | 2 |
| 241 | 6-Sep      | 1 | 997  | GYPC       | 1 | 1757 | RNF125     | 2 |
| 242 | HIST1H2BN  | 1 | 998  | COA1       | 1 | 1758 | BRMS1L     | 2 |
| 243 | ADH5       | 1 | 999  | TMEM179B   | 1 | 1759 | EIF3J      | 2 |
| 244 | PSMB10     | 1 | 1000 | VPS13C     | 1 | 1760 | CCL20      | 2 |
| 245 | HIFX       | 1 | 1001 | FEZ2       | 1 | 1761 | HBP1       | 2 |
| 246 | AP2M1      | 1 | 1002 | RNPC3      | 1 | 1762 | BRD1       | 2 |
| 247 | MCTP2      | 1 | 1003 | SRSF8      | 1 | 1763 | RPL8       | 2 |
| 248 | ACTR3      | 1 | 1004 | JCHAIN     | 1 | 1764 | PNP        | 2 |
| 249 | SDF2L1     | 1 | 1005 | KLRF1      | 1 | 1765 | NRBF2      | 2 |
| 250 | COQ7       | 1 | 1006 | TMEM256    | 1 | 1766 | SEN2       | 2 |
| 251 | ATP5PO     | 1 | 1007 | RBM25      | 1 | 1767 | CXCL2      | 2 |
| 252 | ETFB       | 1 | 1008 | FYN        | 1 | 1768 | CYB5D1     | 2 |
| 253 | TSTD1      | 1 | 1009 | ARL16      | 1 | 1769 | WHRN       | 2 |
| 254 | ATP6V0E1   | 1 | 1010 | DRG2       | 1 | 1770 | TRA2B      | 2 |
| 255 | AL645728.1 | 1 | 1011 | LUC7L3     | 1 | 1771 | STAT4      | 2 |
| 256 | DBNL       | 1 | 1012 | ANGEL2     | 1 | 1772 | S1PR2      | 2 |
| 257 | DENND2D    | 1 | 1013 | AP1M1      | 1 | 1773 | RBBP6      | 2 |
| 258 | TMEM109    | 1 | 1014 | SPSB3      | 1 | 1774 | MAGOH      | 2 |
| 259 | NDUFA3     | 1 | 1015 | CCDC115    | 1 | 1775 | RHOB       | 2 |
| 260 | IGFBP2     | 1 | 1016 | PLD3       | 1 | 1776 | STX17-AS1  | 2 |
| 261 | GNAI2      | 1 | 1017 | AC099778.1 | 1 | 1777 | N4BP2L1    | 2 |
| 262 | AL135925.1 | 1 | 1018 | AC012360.3 | 1 | 1778 | PLEKHA2    | 2 |
| 263 | SRM        | 1 | 1019 | SEM1       | 1 | 1779 | LTA        | 2 |
| 264 | TMEM230    | 1 | 1020 | VTI1B      | 1 | 1780 | LYSMD3     | 2 |
| 265 | APOBEC3G   | 1 | 1021 | THOC7      | 1 | 1781 | IL1R2      | 2 |
| 266 | HNRNPD     | 1 | 1022 | AK9        | 1 | 1782 | MRFAP1     | 2 |
| 267 | MZT2B      | 1 | 1023 | PPCS       | 1 | 1783 | HIST1H1A   | 2 |
| 268 | HCLS1      | 1 | 1024 | MRPS33     | 1 | 1784 | LINC00513  | 2 |
| 269 | PPP1R2C    | 1 | 1025 | PCYT2      | 1 | 1785 | KANSL2     | 2 |
| 270 | BSG        | 1 | 1026 | ATP5PB     | 1 | 1786 | AC144831.1 | 2 |

|     |            |   |      |            |   |      |            |   |
|-----|------------|---|------|------------|---|------|------------|---|
| 271 | TWF2       | 1 | 1027 | TMX3       | 1 | 1787 | DRAM1      | 2 |
| 272 | RBM3       | 1 | 1028 | MBD2       | 1 | 1788 | RBM12      | 2 |
| 273 | TMED4      | 1 | 1029 | PPP1R3E    | 1 | 1789 | SNAPC1     | 2 |
| 274 | ABI3       | 1 | 1030 | PDZD11     | 1 | 1790 | BEX5       | 2 |
| 275 | BRK1       | 1 | 1031 | SLC35B1    | 1 | 1791 | CXorf40A   | 2 |
| 276 | SMC1A      | 1 | 1032 | PMS1       | 1 | 1792 | TXLNG      | 2 |
| 277 | PSMA5      | 1 | 1033 | RNASEH2C   | 1 | 1793 | G0S2       | 2 |
| 278 | DDX46      | 1 | 1034 | EIF4A2     | 1 | 1794 | CD44       | 2 |
| 279 | CD74       | 1 | 1035 | TMEM14C    | 1 | 1795 | NARF       | 2 |
| 280 | PYCARD     | 1 | 1036 | SPATC1L    | 1 | 1796 | C2orf40    | 2 |
| 281 | PHPT1      | 1 | 1037 | PEX13      | 1 | 1797 | PPP2R2A    | 2 |
| 282 | MINOS1     | 1 | 1038 | HIPK3      | 1 | 1798 | NSD3       | 2 |
| 283 | CFLAR      | 1 | 1039 | AAK1       | 1 | 1799 | ALAS1      | 2 |
| 284 | PIP4K2A    | 1 | 1040 | BOD1L1     | 1 | 1800 | SPAG1      | 2 |
| 285 | PREX1      | 1 | 1041 | CBWD3      | 1 | 1801 | DDX18      | 2 |
| 286 | PRTN3      | 1 | 1042 | THEMIS2    | 1 | 1802 | INSIG1     | 2 |
| 287 | SP100      | 1 | 1043 | AL391121.1 | 1 | 1803 | MYLIP      | 2 |
| 288 | ATP5PF     | 1 | 1044 | CABIN1     | 1 | 1804 | HES1       | 2 |
| 289 | ATP5MC1    | 1 | 1045 | SAP18      | 1 | 1805 | PAF1       | 2 |
| 290 | IL18       | 1 | 1046 | TLK1       | 1 | 1806 | CAAP1      | 2 |
| 291 | AC012306.2 | 1 | 1047 | SMG6       | 1 | 1807 | RGS13      | 2 |
| 292 | IKZF3      | 1 | 1048 | STOM       | 1 | 1808 | AC016831.1 | 2 |
| 293 | C9orf16    | 1 | 1049 | PPP1CC     | 1 | 1809 | COX7B      | 2 |
| 294 | MAP4       | 1 | 1050 | MRPS12     | 1 | 1810 | CRY1       | 2 |
| 295 | SNX17      | 1 | 1051 | VAMP4      | 1 | 1811 | BUD31      | 2 |
| 296 | IL2RB      | 1 | 1052 | H2AFY      | 1 | 1812 | PTS        | 2 |
| 297 | RPA2       | 1 | 1053 | LYRM2      | 1 | 1813 | RNF19B     | 2 |
| 298 | VAMP2      | 1 | 1054 | HACL1      | 1 | 1814 | AL021707.1 | 2 |
| 299 | AL021453.1 | 1 | 1055 | DDX39B     | 1 | 1815 | ASTE1      | 2 |
| 300 | PSMB8-AS1  | 1 | 1056 | ATP6AP2    | 1 | 1816 | RLF        | 2 |
| 301 | ABRACL     | 1 | 1057 | LINC00847  | 1 | 1817 | SYTL3      | 2 |
| 302 | EPS8       | 1 | 1058 | PIM1       | 1 | 1818 | AL731571.1 | 2 |
| 303 | MPHOSPH8   | 1 | 1059 | SLAMF6     | 1 | 1819 | BAIAP2     | 2 |
| 304 | NCR1       | 1 | 1060 | PPM1G      | 1 | 1820 | CKAP2      | 2 |
| 305 | RCS1       | 1 | 1061 | UBASH3B    | 1 | 1821 | HNRNPU     | 2 |
| 306 | GNPTAB     | 1 | 1062 | TOMM40     | 1 | 1822 | TUFT1      | 2 |
| 307 | DRAP1      | 1 | 1063 | LINC00476  | 1 | 1823 | PPP1R13B   | 2 |
| 308 | TMBIM4     | 1 | 1064 | CRELD2     | 1 | 1824 | EIF4A1     | 2 |
| 309 | STMP1      | 1 | 1065 | GART       | 1 | 1825 | ZRANB1     | 2 |
| 310 | COX7A2L    | 1 | 1066 | TMEM161B   | 1 | 1826 | SREBF1     | 2 |
| 311 | H3F3A      | 1 | 1067 | SRSF4      | 1 | 1827 | SLC45A4    | 2 |
| 312 | TRGC1      | 1 | 1068 | ERV3-1     | 1 | 1828 | HP         | 2 |
| 313 | KLRC4      | 1 | 1069 | MX1        | 1 | 1829 | RBMX       | 2 |
| 314 | LAMTOR2    | 1 | 1070 | Z93930.2   | 1 | 1830 | HIIST1H3B  | 2 |
| 315 | RPP38      | 1 | 1071 | PSMD3      | 1 | 1831 | MED31      | 2 |
| 316 | MRPL51     | 1 | 1072 | QTRT1      | 1 | 1832 | STRAP      | 2 |
| 317 | RAD23A     | 1 | 1073 | ZNF429     | 1 | 1833 | UBE2H      | 2 |
| 318 | WAS        | 1 | 1074 | C11orf71   | 1 | 1834 | RPP21      | 2 |
| 319 | TXN2       | 1 | 1075 | MFNG       | 1 | 1835 | WAC        | 2 |
| 320 | PNN        | 1 | 1076 | ARHGEF1    | 1 | 1836 | APOA2      | 2 |
| 321 | PARP1      | 1 | 1077 | SEPHS2     | 1 | 1837 | PHF1       | 2 |
| 322 | TMEM14B    | 1 | 1078 | SLC16A1-A  | 1 | 1838 | SHOC2      | 2 |
| 323 | COX5B      | 1 | 1079 | DEF6       | 1 | 1839 | ZNF165     | 2 |
| 324 | GFI1       | 1 | 1080 | TTC13      | 1 | 1840 | CXCL8      | 2 |
| 325 | ZNF844     | 1 | 1081 | NDUFB5     | 1 | 1841 | YTHDC1     | 2 |
| 326 | SKAP1      | 1 | 1082 | PILRB      | 1 | 1842 | HSPA5      | 2 |
| 327 | HMG2       | 1 | 1083 | STX7       | 1 | 1843 | APOA1      | 2 |
| 328 | NDUFB3     | 1 | 1084 | LBH        | 1 | 1844 | SMARCA5    | 2 |
| 329 | PPAN       | 1 | 1085 | AAMP       | 1 | 1845 | CDK5RAP1   | 2 |
| 330 | ARPC1B     | 1 | 1086 | CASP2      | 1 | 1846 | CHKA       | 2 |
| 331 | ITGB1BP1   | 1 | 1087 | ZNF83      | 1 | 1847 | ZPR1       | 2 |
| 332 | TUFM       | 1 | 1088 | RPS19BP1   | 1 | 1848 | REV3L      | 2 |
| 333 | PHB2       | 1 | 1089 | CIDEB      | 1 | 1849 | MIR194-2H  | 2 |
| 334 | DYNLRB1    | 1 | 1090 | SCML4      | 1 | 1850 | AC104116.1 | 2 |
| 335 | ZNHIT6     | 1 | 1091 | RMRP       | 1 | 1851 | EIF1AX     | 2 |
| 336 | GOLGA8A    | 1 | 1092 | COMMD10    | 1 | 1852 | GPM6B      | 2 |
| 337 | NDUFAF3    | 1 | 1093 | POLDIP2    | 1 | 1853 | HIVEP2     | 2 |
| 338 | TBCB       | 1 | 1094 | C6orf226   | 1 | 1854 | CCDC59     | 2 |

|     |            |   |      |            |   |      |            |   |
|-----|------------|---|------|------------|---|------|------------|---|
| 339 | AC020911.2 | 1 | 1095 | UNG        | 1 | 1855 | ZNF706     | 2 |
| 340 | CELF2      | 1 | 1096 | UQCRC2     | 1 | 1856 | ABCF1      | 2 |
| 341 | FADD       | 1 | 1097 | COX18      | 1 | 1857 | DSCR9      | 2 |
| 342 | PYCARD-A   | 1 | 1098 | GPANK1     | 1 | 1858 | SNRPB      | 2 |
| 343 | AC005332.5 | 1 | 1099 | FOPNL      | 1 | 1859 | ZNF10      | 2 |
| 344 | FAM45A     | 1 | 1100 | DNAJC4     | 1 | 1860 | RAB1A      | 2 |
| 345 | TIMM8B     | 1 | 1101 | GPSM3      | 1 | 1861 | H2AFX      | 2 |
| 346 | TRIM14     | 1 | 1102 | ANAPC4     | 1 | 1862 | AC026979.2 | 2 |
| 347 | ADM        | 1 | 1103 | SNRNP200   | 1 | 1863 | ERO1B      | 2 |
| 348 | THRAP3     | 1 | 1104 | AC027644.3 | 1 | 1864 | SOCS4      | 2 |
| 349 | P4HB       | 1 | 1105 | LINC00891  | 1 | 1865 | KMT5C      | 2 |
| 350 | SRP14      | 1 | 1106 | SPA17      | 1 | 1866 | ELOC       | 2 |
| 351 | SNRNP70    | 1 | 1107 | AL136040.1 | 1 | 1867 | RAB5A      | 2 |
| 352 | EDF1       | 1 | 1108 | HTATIP2    | 1 | 1868 | UQCRH      | 2 |
| 353 | CAPN1      | 1 | 1109 | ARL17A     | 1 | 1869 | EFNB2      | 2 |
| 354 | HPGD       | 1 | 1110 | MCTS1      | 1 | 1870 | AC124798.1 | 2 |
| 355 | COPZ1      | 1 | 1111 | HDCC3      | 1 | 1871 | JMY        | 2 |
| 356 | SMDT1      | 1 | 1112 | BRD9       | 1 | 1872 | FXR1       | 2 |
| 357 | ZAP70      | 1 | 1113 | UBE2G2     | 1 | 1873 | TCF7       | 2 |
| 358 | ERAP2      | 1 | 1114 | MYBL1      | 1 | 1874 | GPR35      | 2 |
| 359 | GIMAP6     | 1 | 1115 | RHOBTB3    | 1 | 1875 | WSB1       | 2 |
| 360 | LSM7       | 1 | 1116 | CTSA       | 1 | 1876 | AHR        | 2 |
| 361 | METTL9     | 1 | 1117 | NDUFA13    | 1 | 1877 | FEZ1       | 2 |
| 362 | NME3       | 1 | 1118 | HDAC10     | 1 | 1878 | CERK       | 2 |
| 363 | ARPC5L     | 1 | 1119 | LMF2       | 1 | 1879 | ATF3       | 3 |
| 364 | ZMAT2      | 1 | 1120 | FAAP20     | 1 | 1880 | CCL4       | 3 |
| 365 | TNFRSF1A   | 1 | 1121 | SIRT7      | 1 | 1881 | CCL4L2     | 3 |
| 366 | NEMF       | 1 | 1122 | CDK5RAP3   | 1 | 1882 | TNFAIP3    | 3 |
| 367 | ATP5F1B    | 1 | 1123 | CASP6      | 1 | 1883 | GRASP      | 3 |
| 368 | POLR2E     | 1 | 1124 | MRPL52     | 1 | 1884 | KLF2       | 3 |
| 369 | SSR4       | 1 | 1125 | GPR174     | 1 | 1885 | CREM       | 3 |
| 370 | TMBIM6     | 1 | 1126 | ZCRB1      | 1 | 1886 | NFE2L2     | 3 |
| 371 | FNBP4      | 1 | 1127 | USP48      | 1 | 1887 | GNLY       | 3 |
| 372 | GUK1       | 1 | 1128 | TRIM13     | 1 | 1888 | KLF6       | 3 |
| 373 | CYB5D2     | 1 | 1129 | AZI2       | 1 | 1889 | PTGER4     | 3 |
| 374 | COA3       | 1 | 1130 | NDUFS3     | 1 | 1890 | TXNIP      | 3 |
| 375 | MYDGF      | 1 | 1131 | NIT2       | 1 | 1891 | NKG7       | 3 |
| 376 | TIA1       | 1 | 1132 | SRP9       | 1 | 1892 | BHLHE40    | 3 |
| 377 | COMMD6     | 1 | 1133 | CTSG       | 1 | 1893 | PMAIP1     | 3 |
| 378 | PA2G4      | 1 | 1134 | YARS       | 1 | 1894 | HLA-E      | 3 |
| 379 | ZNF160     | 1 | 1135 | AC093462.1 | 1 | 1895 | CRIP1      | 3 |
| 380 | MDFIC      | 1 | 1136 | PDCD2      | 1 | 1896 | ISG20      | 3 |
| 381 | SNX10      | 1 | 1137 | RIPK3      | 1 | 1897 | RPS4Y1     | 3 |
| 382 | SSH2       | 1 | 1138 | AKAP12     | 1 | 1898 | CD3E       | 3 |
| 383 | PPP1R7     | 1 | 1139 | OGA        | 1 | 1899 | ZFP36L2    | 3 |
| 384 | TALDO1     | 1 | 1140 | SNRPC      | 1 | 1900 | ANXA1      | 3 |
| 385 | CTDSP1     | 1 | 1141 | PDLIM2     | 1 | 1901 | PER1       | 3 |
| 386 | 7-Sep      | 1 | 1142 | PTPN18     | 1 | 1902 | SQSTM1     | 3 |
| 387 | ZBTB38     | 1 | 1143 | TRNAU1AP   | 1 | 1903 | RPS3A      | 3 |
| 388 | TRNT1      | 1 | 1144 | AC245014.3 | 1 | 1904 | PRF1       | 3 |
| 389 | ATP5MG     | 1 | 1145 | ORMDL1     | 1 | 1905 | FTH1       | 3 |
| 390 | IQGAP1     | 1 | 1146 | TRIP11     | 1 | 1906 | RGS2       | 3 |
| 391 | KLHL6      | 1 | 1147 | EIF3I      | 1 | 1907 | CYBA       | 3 |
| 392 | PHB        | 1 | 1148 | SLA2       | 1 | 1908 | IL32       | 3 |
| 393 | BLOC1S1    | 1 | 1149 | AC142472.1 | 1 | 1909 | RPL14      | 3 |
| 394 | DMAC1      | 1 | 1150 | ADAM28     | 1 | 1910 | MT-CYB     | 3 |
| 395 | ORAI2      | 1 | 1151 | ARFGAP2    | 1 | 1911 | HLA-C      | 3 |
| 396 | ATF6B      | 1 | 1152 | C9orf64    | 1 | 1912 | RILPL2     | 3 |
| 397 | ICAM3      | 1 | 1153 | DDX43      | 1 | 1913 | CYTIP      | 3 |
| 398 | CXorf38    | 1 | 1154 | NUDT16L1   | 1 | 1914 | VIM        | 3 |
| 399 | EIF3J-DT   | 1 | 1155 | OTUB1      | 1 | 1915 | SH3BGRL3   | 3 |
| 400 | NAA10      | 1 | 1156 | PGP        | 1 | 1916 | TAGLN2     | 3 |
| 401 | SF3B2      | 1 | 1157 | PIGS       | 1 | 1917 | BRD2       | 3 |
| 402 | IFI27L2    | 1 | 1158 | PPOX       | 1 | 1918 | GPR65      | 3 |
| 403 | TADA3      | 1 | 1159 | ST3GAL1    | 1 | 1919 | IER3       | 3 |
| 404 | NUCB1      | 1 | 1160 | C8orf33    | 1 | 1920 | CTSW       | 3 |
| 405 | ATRAID     | 1 | 1161 | ENOPH1     | 1 | 1921 | PIM3       | 3 |
| 406 | BANF1      | 1 | 1162 | GTF2A2     | 1 | 1922 | GZMH       | 3 |



|     |            |   |      |            |   |      |            |   |
|-----|------------|---|------|------------|---|------|------------|---|
| 407 | GPA1       | 1 | 1163 | SNX14      | 1 | 1923 | HSPB1      | 3 |
| 408 | UQCRQ      | 1 | 1164 | ARFIP2     | 1 | 1924 | RPS4X      | 3 |
| 409 | DGCR6L     | 1 | 1165 | CTBS       | 1 | 1925 | RUNX3      | 3 |
| 410 | NDUFB8     | 1 | 1166 | RAD9A      | 1 | 1926 | SAT1       | 3 |
| 411 | CMTM3      | 1 | 1167 | POP4       | 1 | 1927 | LMNA       | 3 |
| 412 | FAM50A     | 1 | 1168 | MUS81      | 1 | 1928 | CD2        | 3 |
| 413 | RANGRF     | 1 | 1169 | CHMP1A     | 1 | 1929 | CDKN1A     | 3 |
| 414 | HP1BP3     | 1 | 1170 | UR11       | 1 | 1930 | IVNS1ABP   | 3 |
| 415 | CISD3      | 1 | 1171 | ZNF253     | 1 | 1931 | NEAT1      | 3 |
| 416 | TMEM223    | 1 | 1172 | RTL8A      | 1 | 1932 | CD55       | 3 |
| 417 | HNRNPA3    | 1 | 1173 | LSM8       | 1 | 1933 | PHLDA1     | 3 |
| 418 | ILK        | 1 | 1174 | DPYSL2     | 1 | 1934 | PRDM1      | 3 |
| 419 | ANKRD36    | 1 | 1175 | CSRP1      | 1 | 1935 | TMSB10     | 3 |
| 420 | PCSK7      | 1 | 1176 | ZDHHC12    | 1 | 1936 | MTRNR2L1   | 3 |
| 421 | POLR3GL    | 1 | 1177 | AP001462.1 | 1 | 1937 | UAP1       | 3 |
| 422 | ITM2B      | 1 | 1178 | ATXN7L3B   | 1 | 1938 | ITGB7      | 3 |
| 423 | NDUFA12    | 1 | 1179 | PPP1R3D    | 1 | 1939 | RPL7A      | 3 |
| 424 | CHURC1     | 1 | 1180 | CLASP1     | 1 | 1940 | MT-CO2     | 3 |
| 425 | CYBC1      | 1 | 1181 | ATL3       | 1 | 1941 | UCP2       | 3 |
| 426 | PTPN12     | 1 | 1182 | KDELRL1    | 1 | 1942 | RPS21      | 3 |
| 427 | CCNL2      | 1 | 1183 | NSUN5      | 1 | 1943 | CD3D       | 3 |
| 428 | XRCC6      | 1 | 1184 | R3HCC1     | 1 | 1944 | PPP1R10    | 3 |
| 429 | YPEL1      | 1 | 1185 | NUDCD3     | 1 | 1945 | LITAF      | 3 |
| 430 | RAB30-AS1  | 1 | 1186 | LIG1       | 1 | 1946 | RPL28      | 3 |
| 431 | SCP2       | 1 | 1187 | CLINT1     | 1 | 1947 | CARD16     | 3 |
| 432 | NDUFS2     | 1 | 1188 | SDHD       | 1 | 1948 | TMEM173    | 3 |
| 433 | RAP1GDS1   | 1 | 1189 | PCNX1      | 1 | 1949 | SLFN11     | 3 |
| 434 | AC083973.1 | 1 | 1190 | HGH1       | 1 | 1950 | RPS5       | 3 |
| 435 | VPS28      | 1 | 1191 | ERGIC2     | 1 | 1951 | NEU1       | 3 |
| 436 | B4GALT4    | 1 | 1192 | SF3A3      | 1 | 1952 | RNF19A     | 3 |
| 437 | MRPL57     | 1 | 1193 | UGP2       | 1 | 1953 | RPL21      | 3 |
| 438 | ZRANB2     | 1 | 1194 | KIN        | 1 | 1954 | TNF        | 3 |
| 439 | UROS       | 1 | 1195 | YIF1A      | 1 | 1955 | SH3BP5     | 3 |
| 440 | ARHGEF9    | 1 | 1196 | RNPEP      | 1 | 1956 | HOPX       | 3 |
| 441 | GATAD1     | 1 | 1197 | UBE2L3     | 1 | 1957 | KLF13      | 3 |
| 442 | PSMA1      | 1 | 1198 | RPUSD3     | 1 | 1958 | GNG2       | 3 |
| 443 | TXN        | 1 | 1199 | TMEM183A   | 1 | 1959 | S100A4     | 3 |
| 444 | ATP5PD     | 1 | 1200 | ASCC1      | 1 | 1960 | CST7       | 3 |
| 445 | ELANE      | 1 | 1201 | OARD1      | 1 | 1961 | CD3G       | 3 |
| 446 | ZNHIT1     | 1 | 1202 | COA6       | 1 | 1962 | RPS27      | 3 |
| 447 | FKBP1A     | 1 | 1203 | TBC1D1     | 1 | 1963 | B2M        | 3 |
| 448 | TTC14      | 1 | 1204 | VMP1       | 1 | 1964 | SPON2      | 3 |
| 449 | PSMD8      | 1 | 1205 | DNPEP      | 1 | 1965 | AES        | 3 |
| 450 | LSM10      | 1 | 1206 | PRPSAP2    | 1 | 1966 | TLE4       | 3 |
| 451 | NDUFV1     | 1 | 1207 | YIPF2      | 1 | 1967 | RPS14      | 3 |
| 452 | RBCK1      | 1 | 1208 | ZNF701     | 1 | 1968 | RPS9       | 3 |
| 453 | GCHFR      | 1 | 1209 | ARHGAP30   | 1 | 1969 | TNFRSF18   | 3 |
| 454 | BCL7C      | 1 | 1210 | ZNF708     | 1 | 1970 | RPL39      | 3 |
| 455 | B3GALT4    | 1 | 1211 | DBI        | 1 | 1971 | ANXA2      | 3 |
| 456 | COX4I1     | 1 | 1212 | NHLRC2     | 1 | 1972 | COQ10B     | 3 |
| 457 | TMEM101    | 1 | 1213 | LEPROT     | 1 | 1973 | MT-CO1     | 3 |
| 458 | CREBZF     | 1 | 1214 | LINC00685  | 1 | 1974 | ADGRG1     | 3 |
| 459 | CCM2       | 1 | 1215 | LRPAP1     | 1 | 1975 | RPSA       | 3 |
| 460 | SNF8       | 1 | 1216 | C18orf21   | 1 | 1976 | MLF1       | 3 |
| 461 | NDUFS6     | 1 | 1217 | EIF2B1     | 1 | 1977 | COX7C      | 3 |
| 462 | GYG1       | 1 | 1218 | SMARCE1    | 1 | 1978 | SNRPD2     | 3 |
| 463 | GPS1       | 1 | 1219 | AL137077.2 | 1 | 1979 | TNFRSF1B   | 3 |
| 464 | NHP2       | 1 | 1220 | PRPF38B    | 1 | 1980 | BAZ1A      | 3 |
| 465 | HNRNPA2E   | 1 | 1221 | CEBPZOS    | 1 | 1981 | NDUFB7     | 3 |
| 466 | MRPL41     | 1 | 1222 | MPPE1      | 1 | 1982 | S100A6     | 3 |
| 467 | TAPBP      | 1 | 1223 | MRPL49     | 1 | 1983 | RPS3       | 3 |
| 468 | CPNE1      | 1 | 1224 | IWS1       | 1 | 1984 | AC091271.1 | 3 |
| 469 | SLC25A11   | 1 | 1225 | YPEL3      | 1 | 1985 | EMP3       | 3 |
| 470 | AP2S1      | 1 | 1226 | ARIH2OS    | 1 | 1986 | BX284668.6 | 3 |
| 471 | MAGED2     | 1 | 1227 | RBM6       | 1 | 1987 | FCCGR3A    | 3 |
| 472 | TMEM59     | 1 | 1228 | PSMD13     | 1 | 1988 | MRPS6      | 3 |
| 473 | DPH7       | 1 | 1229 | RTCB       | 1 | 1989 | SLC5A3     | 3 |
| 474 | ANAPC16    | 1 | 1230 | CRELD1     | 1 | 1990 | MBP        | 3 |

|     |           |   |      |            |   |      |            |   |
|-----|-----------|---|------|------------|---|------|------------|---|
| 475 | ISCU      | 1 | 1231 | CPT2       | 1 | 1991 | PTPN6      | 3 |
| 476 | P2RX5     | 1 | 1232 | PSME3      | 1 | 1992 | AC087239.1 | 3 |
| 477 | EAPP      | 1 | 1233 | SNX3       | 1 | 1993 | MIR22HG    | 3 |
| 478 | HIST1H2BF | 1 | 1234 | ZNF688     | 1 | 1994 | RPS15      | 3 |
| 479 | NDUFA11   | 1 | 1235 | TMEM9B     | 1 | 1995 | RPL13      | 3 |
| 480 | PGLS      | 1 | 1236 | OCIAD2     | 1 | 1996 | BAG3       | 3 |
| 481 | NCBP2-AS2 | 1 | 1237 | EIF2B2     | 1 | 1997 | ID3        | 3 |
| 482 | ARHGAP4   | 1 | 1238 | KLHL23     | 1 | 1998 | RPS25      | 3 |
| 483 | MRPS18B   | 1 | 1239 | RNF181     | 1 | 1999 | STK4       | 3 |
| 484 | COPS6     | 1 | 1240 | NDUFB11    | 1 | 2000 | RPS29      | 3 |
| 485 | MZB1      | 1 | 1241 | IFRD2      | 1 | 2001 | RPL18A     | 3 |
| 486 | NCK2      | 1 | 1242 | PAFAH2     | 1 | 2002 | RPL19      | 3 |
| 487 | RPN2      | 1 | 1243 | GTF3C5     | 1 | 2003 | LDHB       | 3 |
| 488 | UBL4A     | 1 | 1244 | NFATC2IP   | 1 | 2004 | SMAP2      | 3 |
| 489 | MAPK13    | 1 | 1245 | ASB8       | 1 | 2005 | BIN1       | 3 |
| 490 | S100BPB   | 1 | 1246 | GEMIN6     | 1 | 2006 | LIMD2      | 3 |
| 491 | TSPAN31   | 1 | 1247 | RGPD2      | 1 | 2007 | IL7R       | 3 |
| 492 | TMEM219   | 1 | 1248 | SCAPER     | 1 | 2008 | OSM        | 3 |
| 493 | SERPINB6  | 1 | 1249 | MTERF3     | 1 | 2009 | AVPI1      | 3 |
| 494 | SDHC      | 1 | 1250 | TTL3       | 1 | 2010 | RPL37      | 3 |
| 495 | FYB1      | 1 | 1251 | C16orf58   | 1 | 2011 | RPL29      | 3 |
| 496 | NDUFS8    | 1 | 1252 | WDR61      | 1 | 2012 | CD8A       | 3 |
| 497 | CCNDBP1   | 1 | 1253 | COMMD8     | 1 | 2013 | CD8B       | 3 |
| 498 | FBXO2     | 1 | 1254 | AL606760.3 | 1 | 2014 | RPS15A     | 3 |
| 499 | PIIH      | 1 | 1255 | URM1       | 1 | 2015 | RPL6       | 3 |
| 500 | MCRIP1    | 1 | 1256 | AC064807.1 | 1 | 2016 | TNFRSF9    | 3 |
| 501 | KLRB1     | 1 | 1257 | DDX28      | 1 | 2017 | CDC42SE1   | 3 |
| 502 | MRPS23    | 1 | 1258 | METTTL18   | 1 | 2018 | DUSP8      | 3 |
| 503 | PDIA3     | 1 | 1259 | RNF130     | 1 | 2019 | GZMB       | 3 |
| 504 | RPE       | 1 | 1260 | PFDN2      | 1 | 2020 | LDLR       | 3 |
| 505 | C11orf68  | 1 | 1261 | RAC1       | 1 | 2021 | RPL23A     | 3 |
| 506 | TRAPP6A   | 1 | 1262 | NECAP2     | 1 | 2022 | ARL4C      | 3 |
| 507 | COX7A2    | 1 | 1263 | MBIP       | 1 | 2023 | ERRF1      | 3 |
| 508 | CTSZ      | 1 | 1264 | SRSF1      | 1 | 2024 | ITPRIP     | 3 |
| 509 | ZNF224    | 1 | 1265 | PPM1M      | 1 | 2025 | CCND3      | 3 |
| 510 | AKR1B1    | 1 | 1266 | SCCPDH     | 1 | 2026 | MT-ND1     | 3 |
| 511 | SRI       | 1 | 1267 | FUCA1      | 1 | 2027 | RACK1      | 3 |
| 512 | AGTRAP    | 1 | 1268 | VPS4B      | 1 | 2028 | HLA-DRB1   | 3 |
| 513 | HNRNPR    | 1 | 1269 | NKILA      | 1 | 2029 | TTC38      | 3 |
| 514 | ARFRP1    | 1 | 1270 | RAB37      | 1 | 2030 | SOX4       | 3 |
| 515 | MRPL23    | 1 | 1271 | CENPX      | 1 | 2031 | RPL10      | 3 |
| 516 | MED7      | 1 | 1272 | ESF1       | 1 | 2032 | RABAC1     | 3 |
| 517 | LAMP1     | 1 | 1273 | MRPS14     | 1 | 2033 | RPS28      | 3 |
| 518 | NDUFA9    | 1 | 1274 | COA5       | 1 | 2034 | TPST2      | 3 |
| 519 | NCAM1     | 1 | 1275 | ANXA11     | 1 | 2035 | HSH2D      | 3 |
| 520 | C9orf78   | 1 | 1276 | ACPI       | 1 | 2036 | RPL35A     | 3 |
| 521 | GFOD1     | 1 | 1277 | CTSC       | 1 | 2037 | RPL27A     | 3 |
| 522 | SRSF11    | 1 | 1278 | RWDD1      | 1 | 2038 | HEXIM1     | 3 |
| 523 | CHMP4A    | 1 | 1279 | MZF1-AS1   | 1 | 2039 | TMEM71     | 3 |
| 524 | LENG8     | 1 | 1280 | AL031708.1 | 1 | 2040 | CASP8      | 3 |
| 525 | EPSTI1    | 1 | 1281 | MED8       | 1 | 2041 | OAT        | 3 |
| 526 | SMIM7     | 1 | 1282 | SNRPA1     | 1 | 2042 | RPL30      | 3 |
| 527 | CNBP      | 1 | 1283 | MIR4435-2f | 1 | 2043 | KLRG1      | 3 |
| 528 | SELENOH   | 1 | 1284 | TNFSF10    | 1 | 2044 | PPDPF      | 3 |
| 529 | PRSS21    | 1 | 1285 | ELP5       | 1 | 2045 | JAK1       | 3 |
| 530 | METTTL17  | 1 | 1286 | PPP1R12A   | 1 | 2046 | ATP2B1-AS  | 3 |
| 531 | LINC02256 | 1 | 1287 | AC137767.1 | 1 | 2047 | RPS24      | 3 |
| 532 | ACAA2     | 1 | 1288 | ABHD11     | 1 | 2048 | RPL34      | 3 |
| 533 | GRK2      | 1 | 1289 | C22orf39   | 1 | 2049 | ZC3HAV1    | 3 |
| 534 | IGHG4     | 1 | 1290 | PIN1       | 1 | 2050 | DDIT3      | 3 |
| 535 | PLA2G16   | 1 | 1291 | AP4B1      | 1 | 2051 | MT-ATP6    | 3 |
| 536 | DPM2      | 1 | 1292 | SELENOT    | 1 | 2052 | SELPLG     | 3 |
| 537 | PSMC5     | 1 | 1293 | ELF2       | 1 | 2053 | ARPC2      | 3 |
| 538 | TNFSF12   | 1 | 1294 | SPNS3      | 1 | 2054 | CD52       | 3 |
| 539 | REEP5     | 1 | 1295 | LINC02001  | 1 | 2055 | SAMHD1     | 3 |
| 540 | DCAF7     | 1 | 1296 | C2orf68    | 1 | 2056 | RASGRP2    | 3 |
| 541 | OSTC      | 1 | 1297 | KEAP1      | 1 | 2057 | MALAT1     | 3 |
| 542 | RCCD1     | 1 | 1298 | CHKB       | 1 | 2058 | CAPG       | 3 |

|     |            |   |      |          |   |      |            |   |
|-----|------------|---|------|----------|---|------|------------|---|
| 543 | PYURF      | 1 | 1299 | DNASE1   | 1 | 2059 | PRDX2      | 3 |
| 544 | FAM173A    | 1 | 1300 | SSU72    | 1 | 2060 | NCR3       | 3 |
| 545 | IAH1       | 1 | 1301 | B3GAT3   | 1 | 2061 | TTY15      | 3 |
| 546 | AC025164.1 | 1 | 1302 | NME6     | 1 | 2062 | RPLP2      | 3 |
| 547 | GON4L      | 1 | 1303 | AREG     | 2 | 2063 | LGALS1     | 3 |
| 548 | AL355472.1 | 1 | 1304 | ATP1B3   | 2 | 2064 | HIF1A      | 3 |
| 549 | APOBEC3C   | 1 | 1305 | CD69     | 2 | 2065 | PPIA       | 3 |
| 550 | RPL7L1     | 1 | 1306 | DNAJA1   | 2 | 2066 | XBP1       | 3 |
| 551 | SHISA5     | 1 | 1307 | DNAJB1   | 2 | 2067 | SGK1       | 3 |
| 552 | CD151      | 1 | 1308 | DNAJB6   | 2 | 2068 | RPS16      | 3 |
| 553 | ACP5       | 1 | 1309 | DUSP1    | 2 | 2069 | MT-ND4     | 3 |
| 554 | TLE1       | 1 | 1310 | DUSP2    | 2 | 2070 | RPS19      | 3 |
| 555 | AC245297.3 | 1 | 1311 | FAM177A1 | 2 | 2071 | UPP1       | 3 |
| 556 | SUPT16H    | 1 | 1312 | FOSB     | 2 | 2072 | RPL10A     | 3 |
| 557 | HENMT1     | 1 | 1313 | HSP90AA1 | 2 | 2073 | RPS18      | 3 |
| 558 | CDK2AP2    | 1 | 1314 | HSP90AB1 | 2 | 2074 | SYNE2      | 3 |
| 559 | IL16       | 1 | 1315 | HSPA1A   | 2 | 2075 | LINC00861  | 3 |
| 560 | TSR2       | 1 | 1316 | HSPA1B   | 2 | 2076 | ULBP2      | 3 |
| 561 | PRDX6      | 1 | 1317 | HSPA8    | 2 | 2077 | SOD1       | 3 |
| 562 | TRIM73     | 1 | 1318 | HSPD1    | 2 | 2078 | GLA        | 3 |
| 563 | COX17      | 1 | 1319 | HSPE1    | 2 | 2079 | GBP5       | 3 |
| 564 | RCN2       | 1 | 1320 | HSPH1    | 2 | 2080 | TRBC1      | 3 |
| 565 | EIF2S3     | 1 | 1321 | IRF1     | 2 | 2081 | Z93241.1   | 3 |
| 566 | CRACR2B    | 1 | 1322 | JUN      | 2 | 2082 | IQCN       | 3 |
| 567 | PSMD4      | 1 | 1323 | JUNB     | 2 | 2083 | NACA       | 3 |
| 568 | FGR        | 1 | 1324 | JUND     | 2 | 2084 | CLEC2B     | 3 |
| 569 | TMEM140    | 1 | 1325 | METRNL   | 2 | 2085 | C12orf57   | 3 |
| 570 | P2RY11     | 1 | 1326 | NFKBIA   | 2 | 2086 | MT-CO3     | 3 |
| 571 | NUTM2B-A   | 1 | 1327 | NR4A1    | 2 | 2087 | SUN2       | 3 |
| 572 | PGAM1      | 1 | 1328 | NR4A2    | 2 | 2088 | MT2A       | 3 |
| 573 | SURF6      | 1 | 1329 | PABPC1   | 2 | 2089 | SSR2       | 3 |
| 574 | NUBP2      | 1 | 1330 | PDE4B    | 2 | 2090 | UTY        | 3 |
| 575 | DGUOK      | 1 | 1331 | PPP1R15A | 2 | 2091 | CLCF1      | 3 |
| 576 | TAF8       | 1 | 1332 | REL      | 2 | 2092 | BIN2       | 3 |
| 577 | IFI44      | 1 | 1333 | RGCC     | 2 | 2093 | GLIPR2     | 3 |
| 578 | COA4       | 1 | 1334 | TIPARP   | 2 | 2094 | RPS8       | 3 |
| 579 | HMGB2      | 1 | 1335 | TWISTNB  | 2 | 2095 | LCK        | 3 |
| 580 | RFC1       | 1 | 1336 | UBB      | 2 | 2096 | S1PR5      | 3 |
| 581 | KRT10      | 1 | 1337 | YPEL5    | 2 | 2097 | RPL11      | 3 |
| 582 | KRT81      | 1 | 1338 | ZFP36    | 2 | 2098 | RPS23      | 3 |
| 583 | SUGP2      | 1 | 1339 | ZNF331   | 2 | 2099 | RPL37A     | 3 |
| 584 | IARS2      | 1 | 1340 | CD83     | 2 | 2100 | UBA52      | 3 |
| 585 | LAT        | 1 | 1341 | CHMP1B   | 2 | 2101 | MTHFD2     | 3 |
| 586 | TRABD      | 1 | 1342 | HSPA6    | 2 | 2102 | MT1X       | 3 |
| 587 | AC005837.1 | 1 | 1343 | UBC      | 2 | 2103 | AL450998.2 | 3 |
| 588 | SSNA1      | 1 | 1344 | CEMIP2   | 2 | 2104 | KLF9       | 3 |
| 589 | PSMA7      | 1 | 1345 | NFKBIZ   | 2 | 2105 | RPL36AL    | 3 |
| 590 | C19orf25   | 1 | 1346 | ARL5B    | 2 | 2106 | KMT2E-AS   | 3 |
| 591 | THUMP2     | 1 | 1347 | ARL4A    | 2 | 2107 | CDC42EP3   | 3 |
| 592 | FIBP       | 1 | 1348 | KDM6B    | 2 | 2108 | MAPRE2     | 3 |
| 593 | GSDMD      | 1 | 1349 | CCL3     | 2 | 2109 | TRGV4      | 3 |
| 594 | SNRPA      | 1 | 1350 | BTG2     | 2 | 2110 | RPL26      | 3 |
| 595 | TPM3       | 1 | 1351 | MCL1     | 2 | 2111 | BPGM       | 3 |
| 596 | COX6A1     | 1 | 1352 | NR4A3    | 2 | 2112 | CD300A     | 3 |
| 597 | SPAG7      | 1 | 1353 | CSRNP1   | 2 | 2113 | AC074044.1 | 3 |
| 598 | CYC1       | 1 | 1354 | ICAM1    | 2 | 2114 | RPL41      | 3 |
| 599 | PWWP2A     | 1 | 1355 | SELENOK  | 2 | 2115 | SYTL1      | 3 |
| 600 | HEBP2      | 1 | 1356 | TUBA4A   | 2 | 2116 | ADRB2      | 3 |
| 601 | MDM4       | 1 | 1357 | TNFSF9   | 2 | 2117 | MPV17      | 3 |
| 602 | NKTR       | 1 | 1358 | CXCR4    | 2 | 2118 | RPS27A     | 3 |
| 603 | PNKP       | 1 | 1359 | UBE2S    | 2 | 2119 | HNRNPL     | 3 |
| 604 | GUSB       | 1 | 1360 | CHORDC1  | 2 | 2120 | AL139274.2 | 3 |
| 605 | TSPO       | 1 | 1361 | TSC22D3  | 2 | 2121 | INTS6-AS1  | 3 |
| 606 | CCS        | 1 | 1362 | IFNG     | 2 | 2122 | PRMT5-AS1  | 3 |
| 607 | MRPL43     | 1 | 1363 | MAFF     | 2 | 2123 | RPL38      | 3 |
| 608 | NDUFAF8    | 1 | 1364 | JMJD6    | 2 | 2124 | HLA-DRA    | 3 |
| 609 | DUSP23     | 1 | 1365 | H2AFZ    | 2 | 2125 | KLRC2      | 3 |
| 610 | ALDH9A1    | 1 | 1366 | IFRD1    | 2 | 2126 | MT-ND2     | 3 |

|               |   |                 |   |                 |   |
|---------------|---|-----------------|---|-----------------|---|
| 611 PDIA6     | 1 | 1367 DDX3Y      | 2 | 2127 MFSD10     | 3 |
| 612 ZNF91     | 1 | 1368 FOS        | 2 | 2128 MT-ND5     | 3 |
| 613 CSNK2B    | 1 | 1369 NFKB1      | 2 | 2129 FTL        | 3 |
| 614 ZNF652    | 1 | 1370 ZFAND5     | 2 | 2130 RPL9       | 3 |
| 615 BCO2      | 1 | 1371 SPTY2D1    | 2 | 2131 SNHG25     | 3 |
| 616 CAPNS1    | 1 | 1372 RGS1       | 2 | 2132 TOMM7      | 3 |
| 617 SLC25A45  | 1 | 1373 IDI1       | 2 | 2133 YWHAQ      | 3 |
| 618 DHRS3     | 1 | 1374 SERTAD1    | 2 | 2134 HLA-DPB1   | 3 |
| 619 ANKRD36C  | 1 | 1375 FOSL2      | 2 | 2135 ADAP1      | 3 |
| 620 CORO1B    | 1 | 1376 SKIL       | 2 | 2136 TRAC       | 3 |
| 621 PSMD7     | 1 | 1377 CCNH       | 2 | 2137 MT-ATP8    | 3 |
| 622 TP53TG1   | 1 | 1378 RASGEF1B   | 2 | 2138 SLA        | 3 |
| 623 TSTA3     | 1 | 1379 ELF1       | 2 | 2139 LACTB      | 3 |
| 624 UQCC3     | 1 | 1380 ZC3H12A    | 2 | 2140 PTPN4      | 3 |
| 625 TMEM273   | 1 | 1381 CACYBP     | 2 | 2141 SP140      | 3 |
| 626 TMED2     | 1 | 1382 VPS37B     | 2 | 2142 B4GALT1    | 3 |
| 627 HDAC3     | 1 | 1383 CKS2       | 2 | 2143 ABHD17A    | 3 |
| 628 USP28     | 1 | 1384 PPP1R2     | 2 | 2144 PFDN5      | 3 |
| 629 IDH2      | 1 | 1385 MYADM      | 2 | 2145 RPL36A     | 3 |
| 630 SELENOF   | 1 | 1386 MRPL18     | 2 | 2146 LYST       | 3 |
| 631 PYCR2     | 1 | 1387 DUSP5      | 2 | 2147 STAT3      | 3 |
| 632 DPP7      | 1 | 1388 RANBP2     | 2 | 2148 AHNAK      | 3 |
| 633 CDK5R1    | 1 | 1389 PIK3R1     | 2 | 2149 RGS19      | 3 |
| 634 2-Mar     | 1 | 1390 ARF4       | 2 | 2150 AC023509.4 | 3 |
| 635 REX1BD    | 1 | 1391 ELL2       | 2 | 2151 NFKBIB     | 3 |
| 636 DDX17     | 1 | 1392 EGR1       | 2 | 2152 MLLT11     | 3 |
| 637 SH2D1A    | 1 | 1393 DYNLL1     | 2 | 2153 U2AF1      | 3 |
| 638 TRIM44    | 1 | 1394 EIF1       | 2 | 2154 AKAP13     | 3 |
| 639 SNRPE     | 1 | 1395 H3F3B      | 2 | 2155 GLRX       | 3 |
| 640 MDH1      | 1 | 1396 XCL2       | 2 | 2156 MTRNR2L1   | 3 |
| 641 PDHB      | 1 | 1397 IER5       | 2 | 2157 DOK1       | 3 |
| 642 GIMAP2    | 1 | 1398 MAP3K8     | 2 | 2158 ZFP36L1    | 3 |
| 643 GLOD4     | 1 | 1399 SCX        | 2 | 2159 RPS7       | 3 |
| 644 LMAN2     | 1 | 1400 SYAP1      | 2 | 2160 AC009812.1 | 3 |
| 645 CCR1      | 1 | 1401 ID1        | 2 | 2161 RPL36      | 3 |
| 646 CNPY3     | 1 | 1402 TPT1       | 2 | 2162 AZU1       | 3 |
| 647 OXNAD1    | 1 | 1403 ANKRD37    | 2 | 2163 CD37       | 3 |
| 648 PFKL      | 1 | 1404 LDHA       | 2 | 2164 EIF3D      | 3 |
| 649 NDUFA8    | 1 | 1405 NAF1       | 2 | 2165 NDUFS7     | 3 |
| 650 TSEN54    | 1 | 1406 EIF4A3     | 2 | 2166 CIB1       | 3 |
| 651 WDR74     | 1 | 1407 ZBTB1      | 2 | 2167 GPR108     | 3 |
| 652 HEXA      | 1 | 1408 GTF2B      | 2 | 2168 JAKMIP1    | 3 |
| 653 POLM      | 1 | 1409 SRSF2      | 2 | 2169 FGFBP2     | 3 |
| 654 WASHC1    | 1 | 1410 ETV3       | 2 | 2170 TBRG1      | 3 |
| 655 AKR7A2    | 1 | 1411 NINJ1      | 2 | 2171 MRPS21     | 3 |
| 656 AIP       | 1 | 1412 SARAF      | 2 | 2172 RPL27      | 3 |
| 657 ACADVL    | 1 | 1413 HES4       | 2 | 2173 CAPN2      | 3 |
| 658 JPX       | 1 | 1414 IRF8       | 2 | 2174 ARHGEF37   | 3 |
| 659 TMED10    | 1 | 1415 PLIN2      | 2 | 2175 RPS12      | 3 |
| 660 TCEAL8    | 1 | 1416 RAB8B      | 2 | 2176 ZMYND8     | 3 |
| 661 CDK9      | 1 | 1417 AC020916.1 | 2 | 2177 ANP32B     | 3 |
| 662 CDK10     | 1 | 1418 GNL3       | 2 | 2178 ZBP1       | 3 |
| 663 PRPF31    | 1 | 1419 NXT1       | 2 | 2179 PLK2       | 3 |
| 664 LSM3      | 1 | 1420 DNAJB4     | 2 | 2180 SSBP1      | 3 |
| 665 DUT       | 1 | 1421 RALGAPA1   | 2 | 2181 SNAI1      | 3 |
| 666 FAM118A   | 1 | 1422 PPP1R15B   | 2 | 2182 TXNL4A     | 3 |
| 667 CBLB      | 1 | 1423 SIK1       | 2 | 2183 HAVCR2     | 3 |
| 668 NDUFA1    | 1 | 1424 FKBP4      | 2 | 2184 HSPA2      | 3 |
| 669 PDIA4     | 1 | 1425 PRR7       | 2 | 2185 CCDC173    | 3 |
| 670 SCAMP1-A: | 1 | 1426 ZFAND2A    | 2 | 2186 RALGDS     | 3 |
| 671 MRPL15    | 1 | 1427 STX11      | 2 | 2187 RPS11      | 3 |
| 672 PIN4      | 1 | 1428 PFKFB3     | 2 | 2188 SCLT1      | 3 |
| 673 JTB       | 1 | 1429 CCDC107    | 2 | 2189 DAZAP2     | 3 |
| 674 SMIM27    | 1 | 1430 YWHAZ      | 2 | 2190 SAMD3      | 3 |
| 675 SMIM20    | 1 | 1431 PTMA       | 2 | 2191 ABHD5      | 3 |
| 676 UBE2I     | 1 | 1432 CYCS       | 2 | 2192 S1PR4      | 3 |
| 677 RNF135    | 1 | 1433 BCL2A1     | 2 | 2193 BCL11B     | 3 |
| 678 PEF1      | 1 | 1434 IER2       | 2 | 2194 MX2        | 3 |

|     |            |   |      |            |   |      |            |   |
|-----|------------|---|------|------------|---|------|------------|---|
| 679 | CHMP6      | 1 | 1435 | GPBP1      | 2 | 2195 | RPS2       | 3 |
| 680 | WASHC3     | 1 | 1436 | EIF5       | 2 | 2196 | BTN3A2     | 3 |
| 681 | ANAPC11    | 1 | 1437 | ARIH1      | 2 | 2197 | DHRS7      | 3 |
| 682 | OGG1       | 1 | 1438 | ADGRE5     | 2 | 2198 | RND1       | 3 |
| 683 | LSM4       | 1 | 1439 | BCAS2      | 2 | 2199 | PYM1       | 3 |
| 684 | MYH9       | 1 | 1440 | EZR        | 2 | 2200 | ANKRD9     | 3 |
| 685 | TCTA       | 1 | 1441 | CALM1      | 2 | 2201 | HINT1      | 3 |
| 686 | N4BP2L2    | 1 | 1442 | AC044849.1 | 2 | 2202 | RYK        | 3 |
| 687 | VASP       | 1 | 1443 | NOCT       | 2 | 2203 | POLR2A     | 3 |
| 688 | PPP1R35    | 1 | 1444 | SDCBP      | 2 | 2204 | AL356488.3 | 3 |
| 689 | YDJC       | 1 | 1445 | NFIL3      | 2 | 2205 | CD99       | 3 |
| 690 | GADD45GII  | 1 | 1446 | SRGN       | 2 | 2206 | RPS6       | 3 |
| 691 | PET100     | 1 | 1447 | STK17B     | 2 | 2207 | TSPAN32    | 3 |
| 692 | SLC2A4RG   | 1 | 1448 | DCTN6      | 2 | 2208 | CRABP2     | 3 |
| 693 | FBXO22     | 1 | 1449 | TCP1       | 2 | 2209 | SLC38A2    | 3 |
| 694 | DCAF11     | 1 | 1450 | ETF1       | 2 | 2210 | AL451165.2 | 3 |
| 695 | PUF60      | 1 | 1451 | FAM53C     | 2 | 2211 | ZNF276     | 3 |
| 696 | RINL       | 1 | 1452 | DDX24      | 2 | 2212 | HNRNPA1    | 3 |
| 697 | CLSTN3     | 1 | 1453 | SLC7A5     | 2 | 2213 | PRDX1      | 3 |
| 698 | UHMK1      | 1 | 1454 | DDX5       | 2 | 2214 | POLG2      | 3 |
| 699 | ING4       | 1 | 1455 | NFKBID     | 2 | 2215 | UBL3       | 3 |
| 700 | SELENOW    | 1 | 1456 | AC016831.7 | 2 | 2216 | EHD4       | 3 |
| 701 | TYMP       | 1 | 1457 | DDX3X      | 2 | 2217 | RPL4       | 3 |
| 702 | NOP10      | 1 | 1458 | SOCS3      | 2 | 2218 | RIPOR2     | 3 |
| 703 | ATIC       | 1 | 1459 | RBBP8      | 2 | 2219 | C12orf75   | 3 |
| 704 | SMC3       | 1 | 1460 | TSPYL2     | 2 | 2220 | MRPL16     | 3 |
| 705 | ZNF677     | 1 | 1461 | CHD1       | 2 | 2221 | PRRG2      | 3 |
| 706 | PSMB2      | 1 | 1462 | DEDD2      | 2 | 2222 | SELL       | 3 |
| 707 | HLA-F      | 1 | 1463 | BIRC3      | 2 | 2223 | TMEM238    | 3 |
| 708 | AC246785.3 | 1 | 1464 | HCG18      | 2 | 2224 | MXD1       | 3 |
| 709 | C22orf46   | 1 | 1465 | CCND2      | 2 | 2225 | FXYD5      | 3 |
| 710 | PDAP1      | 1 | 1466 | RELB       | 2 | 2226 | SURF1      | 3 |
| 711 | AUP1       | 1 | 1467 | PTP4A1     | 2 | 2227 | FAM129A    | 3 |
| 712 | DDT        | 1 | 1468 | ODC1       | 2 | 2228 | RPL15      | 3 |
| 713 | NUDT18     | 1 | 1469 | BCL3       | 2 | 2229 | TAP1       | 3 |
| 714 | CCDC90B    | 1 | 1470 | KMT2E      | 2 | 2230 | TRAT1      | 3 |
| 715 | DCTN3      | 1 | 1471 | NEK1       | 2 | 2231 | XPA        | 3 |
| 716 | RNF146     | 1 | 1472 | RRAD       | 2 | 2232 | C7orf50    | 3 |
| 717 | NDUFB9     | 1 | 1473 | BZW1       | 2 | 2233 | HECA       | 3 |
| 718 | ANKRD49    | 1 | 1474 | KLF10      | 2 | 2234 | AC106739.2 | 3 |
| 719 | COMMD7     | 1 | 1475 | MARCKSL1   | 2 | 2235 | AC104695.3 | 3 |
| 720 | NMT2       | 1 | 1476 | DNAJA4     | 2 | 2236 | RPL22      | 3 |
| 721 | NMUR1      | 1 | 1477 | ANKRD28    | 2 | 2237 | RPLP0      | 3 |
| 722 | AC008105.3 | 1 | 1478 | IFFO2      | 2 | 2238 | BAMBI      | 3 |
| 723 | TRIM52     | 1 | 1479 | ERF        | 2 | 2239 | LINC02446  | 3 |
| 724 | CCNT2      | 1 | 1480 | XCL1       | 2 | 2240 | C1QA       | 3 |
| 725 | ELOVL6     | 1 | 1481 | BTG1       | 2 | 2241 | ZRSR2      | 3 |
| 726 | DDOST      | 1 | 1482 | TAGAP      | 2 | 2242 | TKT        | 3 |
| 727 | ZNF43      | 1 | 1483 | CALM2      | 2 | 2243 | RPS13      | 3 |
| 728 | VAMP5      | 1 | 1484 | SBDS       | 2 | 2244 | ZNF584     | 3 |
| 729 | AL135791.1 | 1 | 1485 | HIST1H4C   | 2 | 2245 | FCGR3B     | 3 |
| 730 | MRPL11     | 1 | 1486 | TENT5C     | 2 | 2246 | TUBB2A     | 3 |
| 731 | ARHGEF10   | 1 | 1487 | CSF2       | 2 | 2247 | HLA-DRB5   | 3 |
| 732 | CD96       | 1 | 1488 | CRTAM      | 2 | 2248 | HAX1       | 3 |
| 733 | NMRAL1     | 1 | 1489 | SAMSN1     | 2 | 2249 | KLRC3      | 3 |
| 734 | GRAMD1C    | 1 | 1490 | ZNF184     | 2 | 2250 | PCID2      | 3 |
| 735 | CINP       | 1 | 1491 | YES1       | 2 | 2251 | RECQL      | 3 |
| 736 | NDUFB4     | 1 | 1492 | NUFIP2     | 2 | 2252 | HMBOX1     | 3 |
| 737 | MRPL40     | 1 | 1493 | G3BP2      | 2 | 2253 | DIP2A      | 3 |
| 738 | RNPEPL1    | 1 | 1494 | BRAF       | 2 | 2254 | SLC27A3    | 3 |
| 739 | CCDC66     | 1 | 1495 | CCL3L1     | 2 | 2255 | GHDC       | 3 |
| 740 | RGL4       | 1 | 1496 | NPM1       | 2 | 2256 | LINC02076  | 3 |
| 741 | ITGAE      | 1 | 1497 | ZFY        | 2 | 2257 | SNHG12     | 3 |
| 742 | NDUFC1     | 1 | 1498 | MIR155HG   | 2 | 2258 | SLCO3A1    | 3 |
| 743 | XPO1       | 1 | 1499 | OTULIN     | 2 | 2259 | CRBN       | 3 |
| 744 | DCTN2      | 1 | 1500 | RBM8A      | 2 | 2260 | NIPSNAP2   | 3 |
| 745 | UBLCP1     | 1 | 1501 | B3GNT7     | 2 | 2261 | IQGAP2     | 3 |
| 746 | TMX4       | 1 | 1502 | PRMT9      | 2 | 2262 | ARRB2      | 3 |

|                |   |               |   |                 |   |
|----------------|---|---------------|---|-----------------|---|
| 747 DCTD       | 1 | 1503 CCNL1    | 2 | 2263 RPL18      | 3 |
| 748 SPG7       | 1 | 1504 TPM4     | 2 | 2264 DTHD1      | 3 |
| 749 FDPS       | 1 | 1505 DOK2     | 2 | 2265 SP140L     | 3 |
| 750 ANAPC15    | 1 | 1506 RGS16    | 2 | 2266 ERP29      | 3 |
| 751 DENR       | 1 | 1507 JOSD1    | 2 | 2267 CCDC25     | 3 |
| 752 IFI6       | 1 | 1508 TUBB4B   | 2 | 2268 ARHGEF2    | 3 |
| 753 ZNF766     | 1 | 1509 IDS      | 2 | 2269 AC018653.3 | 3 |
| 754 AC112907.3 | 1 | 1510 RORA     | 2 | 2270 RUFY2      | 3 |
| 755 MRPL17     | 1 | 1511 MAP1LC3B | 2 | 2271 STOML2     | 3 |
| 756 AUH        | 1 | 1512 PNRC1    | 2 | 2272 CLK2       | 3 |
|                |   | 1513 ERN1     | 2 | 2273 ILKAP      | 3 |
|                |   | 1514 RNF139   | 2 | 2274 SMCHD1     | 3 |
|                |   | 1515 SMAD7    | 2 |                 |   |
|                |   | 1516 DENND4A  | 2 |                 |   |

**Supplementary File 1c**

| <b>Pro-inflammatory signature</b> | <b>Immune regulatory signature</b> | <b>Interferon responded signature</b> | <b>Lipid metabolism signature</b> |
|-----------------------------------|------------------------------------|---------------------------------------|-----------------------------------|
| CCL3                              | CD274                              | ISG20                                 | ACP5                              |
| CCL4                              | CD40                               | ISG15                                 | LPL                               |
| CCL20                             | CD80                               | IFI44L                                | TREM2                             |
| CCL3L1                            | CD86                               | GBP1                                  | CCL18                             |
| CCL4L2                            | IDO1                               | CASP1                                 | CTSB                              |
| CXCL1                             | ICOSLG                             | CASP4                                 | CTSD                              |
| CXCL2                             | IL10                               | CXCL9                                 | CTSL                              |
| CXCL3                             | TGFB1                              | CXCL10                                | FABP5                             |
| CXCL5                             |                                    | CXCL11                                | FABP4                             |
| CXCL8                             |                                    | IFIT1                                 | ALOX5 AP                          |
| IL1B                              |                                    | IFIT2                                 |                                   |
| AREG                              |                                    | IFIT3                                 |                                   |
| EREG                              |                                    | IFITM1                                |                                   |
| HBEGF                             |                                    | IFITM3                                |                                   |

| <b>Neutrophil maturation</b> | <b>Neutrophil chemotaxis</b> | <b>Phagocytosis</b> | <b>Type I interferon signaling pathway</b> | <b>Chemokine activity</b> |
|------------------------------|------------------------------|---------------------|--------------------------------------------|---------------------------|
| SELPLG                       | BSG                          | A0A087WW49          | STAT2                                      | C5                        |
| SAT1                         | C1QBP                        | MYH9                | IFNAR1                                     | CCL1                      |
| GRINA                        | C3AR1                        | IGHV4-59            | CDC37                                      | CCL11                     |
| CCL23                        | C5AR1                        | IGHV4-39            | H7C3V1                                     | CCL13                     |
| CCL15                        | C5AR2                        | IGHV2-5             | PTPN6                                      | CCL14                     |
| CCL14                        | CAMK1D                       | IGHV3OR16-9         | IFNA8                                      | CCL15                     |
| CEBPB                        | CCL1                         | TREM2               | IFIT5                                      | CCL16                     |
| ANXA2                        | CCL11                        | IGHV2-70            | TBK1                                       | CCL17                     |
| GDA                          | CCL13                        | IGKC                | GBP2                                       | CCL18                     |
| CLEC4D                       | CCL14                        | TRBC1               | PTPN2                                      | CCL19                     |
| CLEC4E                       | CCL15                        | IGHG1               | MX2                                        | CCL2                      |
| MMP9                         | CCL16                        | IGHM                | MX1                                        | CCL20                     |
| TMCC1                        | CCL17                        | IGHA1               | SAMHD1                                     | CCL21                     |
| AC068580.4                   | CCL18                        | IGHV1-69-2          | ISG20                                      | CCL22                     |
| CTSD                         | CCL19                        | RAB31               | HLA-F                                      | CCL23                     |
| ARG2                         | CCL2                         | TRBC2               | IP6K2                                      | CCL24                     |
| FPR1                         | CCL20                        | CDC42               | YTHDF2                                     | CCL25                     |
| SLC16A3                      | CCL21                        | THBS1               | ZBP1                                       | CCL26                     |
| JUNB                         | CCL22                        | IGLL5               | LSM14A                                     | CCL27                     |
| DUSP1                        | CCL23                        | IGLC2               | CNOT7                                      | CCL28                     |
| RDH12                        | CCL24                        | IGHV4-30-4          | IRF3                                       | CC3                       |
| SLC7A11                      | CCL25                        | IGHV3-43D           | TYK2                                       | CCL3L1                    |
| ASPRV1                       | CCL26                        | IGHV3-30-5          | IKBKE                                      | CCL4                      |
| S100A11                      | CCL3                         | IGHV3-30-3          | HLA-G                                      | CCL4L1                    |
| TIMP2                        | CCL3L1                       | IGHV1-8             | STAT1                                      | CCL5                      |
| MXD1                         | CCL4                         | ARHGAP25            | IRF1                                       | CC7                       |
| CYP4F3                       | CCL4L1                       | IGLL1               | HLA-C                                      | CCL8                      |
| MAP1LC3B2                    | CCL5                         | GULP1               | PTPN11                                     | CKLF                      |
| MAP1LC3B                     | CCL7                         | TRDC                | ISG15                                      | CX3CL1                    |
| YPEL3                        | CCL8                         | RHOG                | USP18                                      | CXCL1                     |
| CCR1                         | CCR7                         | PPARG               | TREX1                                      | CXCL10                    |
| FTL                          | CD300H                       | IGHV4-31            | IRF8                                       | CXCL11                    |
| IL36G                        | CD74                         | IGHV4-38-2          | IRF6                                       | CXCL12                    |
| SLPI                         | CKLF                         | IGLC3               | IFIT3                                      | CXCL13                    |
| RETNLB                       | CSF3R                        | ABCA1               | IRF9                                       | CXCL14                    |
| CSTA                         | CX3CL1                       | STAP1               | IFNA16                                     | CXCL16                    |
| CD300LF                      | CXADR                        | XKR6                | IFNA4                                      | CXCL2                     |
| FTH1                         | CXCL1                        | XKR7                | IFNA6                                      | CXCL3                     |
| HACD4                        | CXCL10                       | XKR9                | TTL12                                      | CXCL5                     |
| MSRB1                        | CXCL11                       | IGHV2-70D           | HLA-E                                      | CXCL6                     |
| IFITM1                       | CXCL13                       | IGHV3-66            | HLA-H                                      | CXCL8                     |
| IFITM2                       | CXCL2                        | IGHV4-61            | HLA-B                                      | CXCL9                     |
| IFITM3                       | CXCL3                        | IGHV1-58            | IFI27                                      | GPR15L                    |
| MMP8                         | CXCL5                        | IGHV5-51            | IRF2                                       | PF4                       |
| S100A6                       | CXCL6                        | IGHV3-38            | PTPN1                                      | PF4V1                     |
| CXCR2                        | CXCL8                        | IGHV3-35            | C9JQL5                                     | PPBP                      |
| IL1B                         | CXCL9                        | IGHV4-28            | JAK1                                       | XL1                       |
| STK17B                       | CXCR1                        | IGHV1-24            | IRF5                                       | XL2                       |
|                              | CXCR2                        | IGHV3-20            | ADAR                                       |                           |
|                              | DAPK2                        | IGHV1-18            | BST2                                       |                           |

|                    |             |          |
|--------------------|-------------|----------|
| DNMIL              | IGHV3-16    | RNASEL   |
| DPEP1              | IGHV1-3     | EGR1     |
| DPP4               | ITGA2       | IFNA14   |
| EDN1               | MARCO       | IFNA7    |
| EDN2               | CD300A      | IFNA1    |
| EDN3               | VAMP7       | IFI35    |
| FCER1G             | S4R3C0      | HSP90AB1 |
| GBF1               | HAVCR1      | MAVS     |
| ITGA1              | RAC1        | MYD88    |
| ITGB2              | ARHGAP12    | IRF4     |
| JAML               | BIN2        | CACTIN   |
| LBP                | APPL2       | IRF7     |
| LGALS3             | MFGES       | RSAD2    |
| MCU                | MEGF10      | MMP12    |
| MDK                | FCGR1A      | OASL     |
| MOSPD2             | IGLC7       | IFNAR2   |
| NCKAP1L            | XKR5        | PSMB8    |
| PDE4B              | XKR4        | SP100    |
| PF4                | A0A0J9YWU9  | HOY3Z8   |
| PF4V1              | GSN         | ABCE1    |
| PIK3CD             | IGHV4-4     | HLA-A    |
| PIK3CG             | IGHV1-2     | NLRC5    |
| PIKFYVE            | C3          | WNT5A    |
| PIP5K1C            | ITGAM       | METTL3   |
| PLA2G1B            | IGHV5-10-1  | IFIT1    |
| PPBP               | A0A0J9YY99  | IFIT2    |
| PPIA               | ABCA7       | IFI6     |
| PPIB               | SH3BP1      | IRAK1    |
| PREX1              | MSR1        | IFNA2    |
| RAC1               | IGLC1       | IFNA10   |
| RAC2               | ALOX15      | IFNA21   |
| RIPOR2             | ELMO1       | IFNA5    |
| S100A12            | IGHV1-69    | IFNA17   |
| S100A8             | NCKAP1L     | IFNB1    |
| S100A9             | RHOBTB2     | IFITM1   |
| SAA1               | IGHV1-69D   | UBE2K    |
| SLIT2              | IGHV4-34    | FADD     |
| SRP54              | RHOBTB1     | TRIM6    |
| SYK                | IGHV3-64D   | OAS2     |
| TGFB2              | IGLC6       | XAF1     |
| THBS4              | IGHV3-9     | MUL1     |
| TIRAP              | IGHV3-7     | DCST1    |
| URS00000B7E30_9606 | IGHV3-33    | IFITM2   |
| VAV1               | IGHV3-30    | IFITM3   |
| VAV3               | IGHV3-53    | YTHDF3   |
| XCL1               | IGHV3-13    | OAS1     |
| XCL2               | IGHV3-23    | OAS3     |
|                    | IGHV3-48    |          |
|                    | IGHV3-11    |          |
|                    | IGHV1-46    |          |
|                    | IGHV6-1     |          |
|                    | IGHV3-21    |          |
|                    | IGHV2-26    |          |
|                    | IGHV3-73    |          |
|                    | IGHV7-4-1   |          |
|                    | A0A0J9YW62  |          |
|                    | ITGB2       |          |
|                    | FCER1G      |          |
|                    | IGHV1OR21-1 |          |
|                    | GATA2       |          |
|                    | ADGRB1      |          |
|                    | IGHV3-15    |          |
|                    | IGHV7-81    |          |
|                    | DOCK1       |          |
|                    | XKR8        |          |
|                    | IGHV3-43    |          |
|                    | IGHD        |          |
|                    | IGHA2       |          |



IGHG4  
 IGHG3  
 IGHG2  
 IGHE  
 RAC2  
 IGHV1OR15-9  
 IGHV2OR16-5  
 IGHV3-72  
 IGHV3-74  
 IGHV4-30-2  
 IGHV3-49  
 IGHV1-45  
 FCGR2B  
 IGHV3OR16-8  
 IGHV3OR16-10  
 IGHV3OR16-13  
 IGHV3OR15-7  
 IGHV1OR15-1  
 IGHV3OR16-12  
 IGHV4OR15-8  
 ANO6  
 F2RL1  
 AIF1  
 RHOH  
 CD36  
 IGHV3-64

| Exhaustion | Cytotoxicity | Treg  |
|------------|--------------|-------|
| TIGIT      | KLRG1        | IL2RA |
| PDCD1      | KLRD1        | FOXP3 |
| CTLA4      | GZMK         |       |
| CD160      | GZMB         |       |
| KLRC1      | GZMA         |       |
| BTLA       | GNLY         |       |
| HAVCR2     | PRF1         |       |
| LAG3       | GZMM         |       |
|            | NKG7         |       |
|            | TBX21        |       |
|            | ZEB2         |       |
|            | HOPX         |       |
|            | GZMH         |       |
|            | KLRK1        |       |
|            | IFNG         |       |
|            | CCL3         |       |
|            | CST7         |       |
|            | ADGRG1       |       |
|            | IL32         |       |
|            | CRTAM        |       |
|            | CX3CR1       |       |
|            | KLRC1        |       |
|            | FGFBP2       |       |
|            | FCGR3A       |       |
|            | NCR3         |       |
|            | CCL4         |       |

**Supplementary File 1d**

| <b>Celltype</b>              | <b>Abbreviation</b> | <b>Markers</b>       | <b>Reference</b>                                                                       |
|------------------------------|---------------------|----------------------|----------------------------------------------------------------------------------------|
| Hepatocytes                  | Hepatocytes         | ALB,TTR,APOA1        | 10.1186/s13059-020-02210-0,10.1016/j.cell.2020.11.041,10.1016/j.cell.2020.11.041       |
| Cholangiocytes               | Cholangiocytes      | KRT19,KRT7,CFTR      | 10.1186/s13059-020-02210-0,10.1186/s13059-020-02210-0,10.1186/s13059-020-02210-0       |
| Endothelial cells            | ECs                 | PECAM1,VWF,CDH5      | 10.7150/thno.54917,10.1158/1078-0432.CCR-19-3231,10.1038/s41556-019-0446-7             |
| Hepatic stellate cells       | HepSCs              | PDGFRB,ACTA2,RGS5    | 10.1172/JC1146987,10.1016/j.cell.2020.11.041,10.1016/j.cell.2020.11.041                |
| Proliferating cells          | ProliferatingCells  | MKI67, TOP2A, STMN1  | 10.1158/1078-0432.CCR-19-3231,10.1681/ASN.2019080832,10.1038/s41467-019-14256-1        |
| B cells                      | BCells              | CD79A,MS4A1,CD19     | 10.1038/s41467-021-21795-z,10.1038/s41467-021-21795-z,10.1038/s41422-020-0378-6        |
| Plasma cells                 | PlasmaCells         | JCHAIN,CD79A,MZB1    | 10.1038/s41467-021-21795-z,10.1038/s41467-021-21795-z,10.1038/s41467-019-14256-1       |
| T and NK cells               | TandNK              | CD3D,CD3E,NKG7       | 10.1038/s41467-021-21795-z,10.1016/j.immuni.2019.09.008,10.1530/ERC-22-0325            |
| Neutrophils                  | Neutrophils         | FCGR3B,S100A9,S100A8 | 10.1038/s41467-021-22801-0,10.1038/s41467-021-22801-0,10.1038/s41467-021-22801-0       |
| Mast cells                   | MastCells           | TPSAB1,TPSB2,CPA3    | 10.1158/1078-0432.CCR-19-3231,10.1038/s41467-021-22801-0,10.1016/j.immuni.2019.09.008  |
| Mononuclear phagocytes       | MPs                 | CD14,CSF1R,HLA-DRA   | 10.1038/s41586-019-1631-3,10.1038/s41586-019-1631-3,10.1038/s41586-019-1631-3          |
| Plasmacytoid dendritic cells | pDCs                | IL3RA,CLEC4C,LILRA4  | 10.1158/1078-0432.CCR-19-3231,10.1158/1078-0432.CCR-19-3231,10.1038/s41593-020-00789-y |

  

| <b>Celltype</b>                     | <b>Abbreviation</b> | <b>Markers</b>      | <b>Reference</b>                                                                     |
|-------------------------------------|---------------------|---------------------|--------------------------------------------------------------------------------------|
| Proliferating cells                 | ProliferatingCells  | MKI67, TOP2A, STMN1 | 10.1158/1078-0432.CCR-19-3231,10.1681/ASN.2019080832,10.1038/s41467-019-14256-1      |
| Macrophages                         | Macrophages         | CD14,C1QA,CSF1R     | 10.1158/1078-0432.CCR-19-3231,10.1016/j.immuni.2019.09.008,10.1038/s41556-019-0446-7 |
| Monocytes                           | Monocytes           | LYZ,FCN1,VCAN       | 10.1038/s41467-019-11049-4,10.1038/s41467-021-22801-0,10.1038/s41467-021-22801-0     |
| Mature dendritic cells              | MatureDCs           | LAMP3,CCR7,CD83     | 10.1158/2159-8290.CD-19-0138,10.1038/s41591-021-01323-8,10.1158/2159-8290.CD-19-0138 |
| Conventional type 1 dendritic cells | cDC1                | CLEC9A,XCR1,IRF8    | 10.1038/s41586-019-1652-y,10.1038/s41586-019-1652-y,10.1038/s41422-020-0374-x        |
| Conventional type 2 dendritic cells | cDC2                | CD1C,CLEC10A,FCER1A | 10.1038/s41586-019-1652-y,10.1038/s41586-019-1652-y,10.1038/s41593-020-00789-y       |
| Kupffer cells                       | KCs                 | MARCO,CD5L,VCAM1    | 10.1016/j.cell.2020.11.041,10.1016/j.cell.2020.10.048,10.1038/s41586-019-1631-3      |

  

| <b>Celltype</b>                           | <b>Abbreviation</b> | <b>Markers</b>     | <b>Reference</b>                                                                     |
|-------------------------------------------|---------------------|--------------------|--------------------------------------------------------------------------------------|
| Group 3 innate lymphoid cells             | ILC3                | IL1R1,IL23R,KIT    | 10.1038/s41590-019-0425-y,10.1038/s41590-019-0425-y,10.1038/s41586-021-03852-1       |
| NK T cells                                | NKT                 | NKG7,CD3D,GNLY     | 10.7150/thno.48201,10.7150/thno.48201,10.7150/thno.48201                             |
| Natural killer cells                      | NK                  | NKG7,GNLY,NCAM1    | 10.1038/s41392-020-00248-x,10.1038/s41467-021-21795-z,10.1126/science.aad0501        |
| CD4+ naive T cells                        | CD4NaiveT           | CCR7,SELL,LEF1     | 10.1038/s41467-021-22164-                                                            |
| CD4+ memory T cells                       | CD4Tmem             | CD4,IL7R,CD40LG    | 10.1182/blood-2018-08-862292,10.1016/j.immuni.2020.12.011,10.1038/s41467-022-33170-7 |
| CD4+ regulatory T cells                   | CD4Treg             | CTLA4,FOXP3,IL2RA  | 10.1038/s41421-020-0157-z,10.1038/s41421-020-0157-z,10.1038/s41421-020-0157-z        |
| CD8+ mucosal-associated invariant T cells | CD8MAIT             | KLRB1,SLC4A10,NCR3 | 10.1016/j.cell.2021.05.013,10.1186/s13059-019-1906-x,10.1038/s41392-020-00263-y      |
| CD8+ effector T cells                     | CD8Teff             | CD8A,GZMK,CD3D     | 10.1038/s41467-021-22801-0,10.1038/s41591-019-0590-4,10.1016/j.cell.2020.06.001      |
